# Supplementary material for: Differences in interactions between transmembrane domains tune the activation of metabotropic glutamate receptors
Source: eLife. 2021 Apr 21;10:e67027. doi: 10.7554/eLife.67027 (PMC8102066; doi:10.7554/eLife.67027)
Supplement: Figure 1—source data 1. [file elife-67027-fig1-data1.xlsx]

## Sheet: Fig 1 Data
Figure 1
Part C
	Number of Spots
Count type	SNAP-mGluR2-TMD	SNAP-mGluR3-TMD
1-step	865	992
2-step	661	401
3-step	64	37
4-step	8	5
Part D
	% Dimerization
Experiment Day	SNAP-mGluR2	SNAP-mGluR3	SNAP-mGluR2-TMD	SNAP-mGluR3-TMD	SNAP-B2AR
1	99.9338	99.3923	78.6792	43.2609	10
1	89.1597	113.077	81.8919	39.2754	2.2807
1	93.8461	108.841	89.1736	46.8047	17.3684
1	99.589	109.588	90	49.0909	12.6804
2	102.644	99.3923	80.566	38.5294	11.1765
2	102.903	101.111	81.4286	52.5954	12.4719
2	99.8039	94.6632	74.2105	57.0588
2	105.517	95.102	90.6523	48.4615
3			89.1543	33.6364
3			81.0148	46.5217
3			88.1818
3			84.8052
4			74.0909
4			78.5484
Part E
	Surface Expression
Measurement	SNAP-mGluR2	SNAP-mGluR3	SNAP-mGluR2-TMD	SNAP-mGluR3-TMD	SNAP-B2AR
1	1.61489	0.764149	0.623013	1.03385	1.09459
2	1.336	0.772926	0.603259	0.772926	0.898464
3	0.58671	1.13181	1.11649	0.812724	0.853056
4	0.397884	1.71005	0.892211	0.762789	1.05825
5	0.440579	1.1614	0.568426	0.824163	0.785426
6	0.663885	1.01723	0.73511	0.955356	1.17063
7	1.28954	1.10554	0.798785	0.887068	0.64486
8	1.67051	0.716611	1.16456	1.3512	0.810685
Part F
	% Dimerization
Experiment Day	SNAP-mGluR2	SNAP-mGluR2-C121A	SNAP-mGluR2-C121A-mGluR3TMD	SNAP-mGluR3	SNAP-mGluR3-C127A	SNAP-mGluR3-C127A-mGluR2TMD
1	99.9338	84.6809	85.7143	99.3923	59.1729	86.2963
1	89.1597	85.5556	69.7203	101.111	57.4157	76.5854
1	93.8462	89.2908	76.4198	94.6632	54.4628	78.5906
1	99.589	98.6207	54.2534	109.588	49.375	83.1937
2	102.644	88.7952	67.1084	88.7952	38.9209	78.5714
2	102.903	100.976	58.3871	111.739	54.1975	77.1429
2	99.8039	88.7952	68.3784	113.077	39.6124	83.9759
2	105.517	90.7519	79.2857	108.841	50.1227	66.5101
Part G
	Surface Expression
Measurement	SNAP-mGluR2	SNAP-mGluR2-C121A	SNAP-mGluR2-C121A-mGluR3TMD	SNAP-mGluR3	SNAP-mGluR3-C127A	SNAP-mGluR3-C127A-mGluR2TMD
1	1.52378	0.863627	0.691083	0.721034	1.61618	1.23146
2	1.26062	0.771969	1.14791	0.729316	1.19385	0.76647
3	0.553607	0.904099	0.772553	1.06795	1.2712	1.17691
4	0.626427	1.52814	1.31054	1.61357	1.33155	1.60141
5	1.27662	0.623014	0.911186	1.81144	1.83584	1.07346
6	0.808138	1.02177	1.31126	1.15436	0.839282	1.57932
7	0.902602	1.00232	0.989628	1.26478	1.44506	1.47962
8	1.04821	1.05788	1.28578	1.13137	1.29994	0.929138

## Sheet: Fig 1 Statistics
Figure 1
Part D	p value
One-way ANOVA	8.91008e-30
Tukey-Kramer
SNAP-mGluR2 vs. SNAP-mGluR3	0.783915
SNAP-mGluR2 vs. SNAP-mGluR2-TMD	4.54858e-06
SNAP-mGluR2 vs. SNAP-mGluR3-TMD	8.16e-13
SNAP-mGluR2 vs. SNAP-B2AR	8.16e-13
SNAP-mGluR3 vs. SNAP-mGluR2-TMD	6.93461e-08
SNAP-mGluR3 vs. SNAP-mGluR3-TMD	8.16e-13
SNAP-mGluR3 vs. SNAP-B2AR	8.16e-13
SNAP-mGluR2-TMD vs. SNAP-mGluR3-TMD	8.16e-13
SNAP-mGluR2-TMD vs. SNAP-B2AR	8.16e-13
SNAP-mGluR3-TMD vs. SNAP-B2AR	1.695e-12
Part E
One-way ANOVA	0.643284
Part F
One-way ANOVA	2.13892e-17
Tukey-Kramer
SNAP-mGluR2 vs. SNAP-mGluR2-C121A	0.271413
SNAP-mGluR2 vs. SNAP-mGluR2-C121A-mGluR3TMD	2.02518e-08
SNAP-mGluR2 vs. SNAP-mGluR3	0.872281
SNAP-mGluR2 vs. SNAP-mGluR3-C127A	1.07e-12
SNAP-mGluR2 vs. SNAP-mGluR3-C127A-mGluR2TMD	4.62927e-05
SNAP-mGluR2-C121A vs. SNAP-mGluR2-C121A-mGluR3TMD	2.51375e-05
SNAP-mGluR2-C121A vs. SNAP-mGluR3	0.0233258
SNAP-mGluR2-C121A vs. SNAP-mGluR3-C127A	3.274e-12
SNAP-mGluR2-C121A vs. SNAP-mGluR3-C127A-mGluR2TMD	0.0303972
SNAP-mGluR2-C121A-mGluR3TMD vs. SNAP-mGluR3	5.83849e-10
SNAP-mGluR2-C121A-mGluR3TMD vs. SNAP-mGluR3-C127A	9.28476e-05
SNAP-mGluR2-C121A-mGluR3TMD vs. SNAP-mGluR3-C127A-mGluR2TMD	0.193404
SNAP-mGluR3 vs. SNAP-mGluR3-C127A	1.059e-12
SNAP-mGluR3 vs. SNAP-mGluR3-C127A-mGluR2TMD	1.19267e-06
SNAP-mGluR3-C127A vs. SNAP-mGluR3-C127A-mGluR2TMD	4.07039e-08
Part G
One-way ANOVA	0.121948

## Sheet: Fig 1 - FS1 Data
Figure 1 - figure supplement 1
Part F
	Number of Spots
	Co-transfected	Co-transfected	Combined Lysis	Combined Lysis
Experiment Day	SNAP-mGluR2-TMD	CLIP-mGluR2-TMD	SNAP-mGluR2-TMD	CLIP-mGluR2-TMD
1	146	117	198	9
1	124	78	148	11
2	145	104	116	5

## Sheet: Fig 1 - FS2 Data
Figure 1 - figure supplement 2
Part B
	% Dimerization
Experiment Day	SNAP-mGluR2-TMD	SNAP-mGluR3-TMD
1	84.1176	44.2553
1	83.2203	59.6774
1	82.562	56.6667
2	80	53.2653
2	75.9504	36
Part C
	% Dimerization
Experiment Day	SNAP-mGluR2-TMD + IGEPAL	SNAP-mGluR2-TMD + DDM/CHS	SNAP-mGluR3-TMD + IGEPAL	SNAP-mGluR3-TMD + DDM/CHS
1	78.6792	70.2395	62.8571	65
1	81.8919	78.8889	50.8108	36.1538
1	71	71.0127	44.2553	35.7143
1	74.2105	61.5329	38.5294	44.8387
1	81.8919	87.0588	52.5954	48.8235

## Sheet: Fig 1 - FS2 Statistics
Figure 1 - figure supplement 2	p value
Part B	0.00112847
Unpaired t-test
Part C	6.23821e-05
One-way ANOVA
Tukey-Kramer	0.915428
SNAP-mGluR2-TMD + IGEPAL vs. SNAP-mGluR2-TMD + DDM/CHS	0.00117371
SNAP-mGluR2-TMD + IGEPAL vs. SNAP-mGluR3-TMD + IGEPAL	0.000336729
SNAP-mGluR2-TMD + IGEPAL vs. SNAP-mGluR3-TMD + DDM/CHS	0.00433869
SNAP-mGluR2-TMD + DDM/CHS vs. SNAP-mGluR3-TMD + IGEPAL	0.00120818
SNAP-mGluR2-TMD + DDM/CHS vs. SNAP-mGluR3-TMD + DDM CHS	0.920358
SNAP-mGluR3-TMD + IGEPAL vs. SNAP-mGluR3-TMD + DDM/CHS

## Sheet: Fig 1 - FS3 Data
Figure 1 - figure supplement 3
Part B
	Change Donor Fluorescence (% Change)
Experiment Day	SNAP-B2AR	SNAP-mGluR2-TMD	SNAP-mGluR3-TMD
1	19.0491	67.106	55.365
1	12.0722	76.4394	55.5736
1	12.8831	82.1229	52.9083
1	15.7383	86.7154	52.8018
2	17.1037	98.7562	47.9488
2	20.7123	89.0625	52.3045
2	15.5893	56.8421	51.1516
2	18.7966	77.5064	53.2099

## Sheet: Fig 1 - FS3 Statistics
Figure 1 - figure supplement 3
Part B	p value
Unpaired t-test
B2AR vs mGluR2-TMD	1.37454e-06
mGluR2-TMD vs mGluR3-TMD	0.000606588

## Sheet: Fig 1 - FS4 Data
Figure 1 - figure supplement 4
Number of Dimeric Macrostates Visited	mGluR2	mGluR3
Unbound	51	58
1	21	19
2	12	9
3	4	5
4	2	1
Total Trajectories	90	92

## Sheet: Fig 1 - FS5 Data
Figure 1 - figure supplement 5
	Macrostate	Helices with a >40% probability of being at an interface	Macrostate
	Label	that form the largest	Probability
		number of interface contacts
mGluR2	M	monomeric	0.598
	c	TM1/TM1	0.178
	a	TM1/TM4	0.113
	b	TM1/TM5	0.104
	d	TM3/TM6	0.006
mGluR3	M	monomeric	0.7491
	a'	TM7/TM3	0.1388
	b'	TM1/TM1	0.0679
	c'	TM5/TM4	0.0153
	d'	TM7/TM6	0.0144
	e'	TM7/TM4	0.0144
