# Supplementary material for: Differences in interactions between transmembrane domains tune the activation of metabotropic glutamate receptors
Source: eLife. 2021 Apr 21;10:e67027. doi: 10.7554/eLife.67027 (PMC8102066; doi:10.7554/eLife.67027)
Supplement: Figure 2—source data 1. [file elife-67027-fig2-data1.xlsx]

## Sheet: Fig 2 Data
Figure 2
Part C
	% Dimerization
Experiment Day	SNAP-mGluR2-TMD	SNAP-mGluR2-TMD-3xTM4	SNAP-mGluR3-TMD	SNAP-mGluR3-TMD-3xTM4
1	74.0909	51.1765	46.5217	62.3404
1	74.2105	35.7143	39.2754	73.9506
1	78.6792	52.5	46.8047	75.9375
2	81.8919	52.7907	49.0909	68.7879
2	82.728	48.5366	43.2609	74.6154
2	78.888	49.8291	52.5954	66.1905
Part D
	Surface Expression
Measurement	SNAP-mGluR2-TMD	SNAP-mGluR2-TMD-3xTM4	SNAP-mGluR3-TMD	SNAP-mGluR3-TMD-3xTM4
1	0.876069	0.658524	1.07453	0.830977
2	0.848291	0.503587	1.08688	0.67193
3	0.380389	0.644219	0.962195	0.855808
4	1.217	1.21916	1.07262	0.545817
5	0.593643	0.582323	0.966531	1.54814
6	1.27601	1.73545	1.3434	1.04542
7	1.71927	1.14568	1.24738	1.16691
8	1.08933	1.7751	1.35985	1.68141
Part E
	% Dimerization
Experiment Day	SNAP-mGluR2-C121A	SNAP-mGluR2-C121A-mGluR3TMD	SNAP-mGluR2-C121A-3xTM4
1	84.6809	85.7143	66.6355
1	85.5556	69.7203	80
1	89.2908	76.4198	56.6667
1	98.6207	54.2534	67.9412
2	88.7952	67.1084	64.2857
2	100.976	58.3871	76.7133
2	88.7952	68.3784	70.7947
2	90.7519	79.2857
Part F
	Surface Expression
Measurement	SNAP-mGluR2-C121A	SNAP-mGluR2-C121A-mGluR3TMD	SNAP-mGluR2-C121A-3xTM4
1	1.05489	0.844136	1.21148
2	0.942934	1.40214	1.05489
3	0.703712	0.943648	0.798666
4	0.772944	1.60079	1.03748
5	0.760991	1.11298	0.973135
6	1.24805	1.72523	1.55173
7	1.22431	1.37174	1.85185
8	1.29217	1.099	1.34882
Part G
	% Dimerization
Experiment Day	SNAP-mGluR3-C127A	SNAP-mGluR3-C127A-mGluR2TMD	SNAP-mGluR3-C127A-3xTM4
1	59.1729	86.2963	79.2019
1	57.4157	76.5854	65.8621
1	54.4628	78.5906	67.9874
1	49.375	83.1937	75.9259
2	38.9209	78.5714	87.1014
2	54.1975	77.1429	71.7391
2	39.6124	83.9759
2	50.1227	66.5101
Part H
	Surface Expression
Measurement	SNAP-mGluR3-C127A	SNAP-mGluR3-C127A-mGluR2TMD	SNAP-mGluR3-C127A-3xTM4
1	1.19354	0.909425	1.13603
2	0.881646	0.566032	0.625245
3	0.938769	0.869139	0.614221
4	0.983338	1.18263	1.29378
5	1.35575	0.79274	0.848698
6	0.619803	1.06046	1.43001
7	1.06716	0.807865	1.21882
8	0.959995	1.02924	0.846269

## Sheet: Fig 2 Statistics
Figure 2
Part C	p value
One-way ANOVA	4.70907e-10
Tukey-Kramer
SNAP-mGluR2-TMD vs. SNAP-mGluR2-TMD-3xTM4	1.48294e-08
SNAP-mGluR2-TMD vs. SNAP-mGluR3-TMD	4.52274e-09
SNAP-mGluR2-TMD vs. SNAP-mGluR3-TMD-3xTM4	0.0567359
SNAP-mGluR2-TMD-3xTM4 vs. SNAP-mGluR3-TMD	0.883442
SNAP-mGluR2-TMD-3xTM4 vs. SNAP-mGluR3-TMD-3xTM4	2.21767e-06
SNAP-mGluR3-TMD vs. SNAP-mGluR3-TMD-3xTM4	5.30477e-07
Part D
One-way ANOVA	0.912037
Part E
One-way ANOVA	4.03111e-05
Tukey-Kramer
SNAP-mGluR2-C121A vs. SNAP-mGluR2-C121A-mGluR3TMD	0.000163877
SNAP-mGluR2-C121A vs. SNAP-mGluR2-C121A-3xTM4	0.000150143
SNAP-mGluR2-C121A-mGluR3TMD vs. SNAP-mGluR2-C121A-3xTM4	0.97587
Part F
One-way ANOVA	0.189347
Part G
One-way ANOVA	3.59487e-07
Tukey-Kramer
SNAP-mGluR3-C127A vs. SNAP-mGluR3-C127A-mGluR2TMD	5.40998e-07
SNAP-mGluR3-C127A vs. SNAP-mGluR3-C127A-3xTM4	1.4845e-05
SNAP-mGluR3-C127A-mGluR2TMD vs. SNAP-mGluR3-C127A-3xTM4	0.530797
Part H
One-way ANOVA	0.653166

## Sheet: Fig 2 - FS 4 Data
Figure 2 - figure supplement 4
Part B
	% Dimerization
Experiment Day	SNAP-mGluR2-TMD	SNAP-mGluR2-TMD-A677S	SNAP-mGluR2-TMD-A681F	SNAP-mGluR2-TMD-A685G	SNAP-mGluR3-TMD	SNAP-mGluR3-TMD-S686A	SNAP-mGluR3-TMD-F690A	SNAP-mGluR3-TMD-G694A
1	87.96	54.2	56.67	63.02	38.53	64.77	66.36	70
1	78.68	52.16	35.61	47.78	52.6	72.46	58.38	58.38
1	82.31	72.54	63.02	44.72	57.06	70.92	76.15	75.11
2	78.89	56.06	48.33	40.85	48.46	70.37	53.64	49.84
2	74.21	73.52	55.35	61.26	33.64	74.48	61.23	47.53
2	81.89	50.87	76.96	49.46	49.09	76	70	72.12
Part C
	Surface Expression
Measurement	SNAP-mGluR2-TMD	SNAP-mGluR2-TMD-A677S	SNAP-mGluR2-TMD-A681F	SNAP-mGluR2-TMD-A685G	SNAP-mGluR3-TMD	SNAP-mGluR3-TMD-S686A	SNAP-mGluR3-TMD-F690A	SNAP-mGluR3-TMD-G694A
1	1.15	0.88	1.18	0.91	1.21	1.38	0.54	0.55
2	1.6	1.16	1.01	0.9	0.73	0.86	0.72	1.22
3	0.96	0.87	0.96	0.79	0.91	1.14	1.02	0.5
4	0.39	0.51	0.78	0.81	1.18	0.77	1.35	1.21
5	0.92	0.88	1.12	0.71	0.6	0.84	0.95	0.98
6	0.48	0.94	1.57	1.21	0.83	1.13	0.66	1.03
7	0.94	0.47	1.86	1.86	1.36	0.76	0.97	0.63
8	1.56	1.29	1.65	1.2	1.16	0.64	0.65	1.54

## Sheet: Fig 2 - FS 4 Statistics
Figure 2 - figure supplement 4
Part B	p value
One-way ANOVA	0.000297399
Tukey-Kramer
SNAP-mGluR2-TMD vs. SNAP-mGluR2-TMD-A677S	0.00914054
SNAP-mGluR2-TMD vs. SNAP-mGluR2-TMD-A681F	0.00198679
SNAP-mGluR2-TMD vs. SNAP-mGluR2-TMD-A685G	0.00029975
SNAP-mGluR2-TMD-A677S vs. SNAP-mGluR2-TMD-A681F	0.905584
SNAP-mGluR2-TMD-A677S vs. SNAP-mGluR2-TMD-A685G	0.453021
SNAP-mGluR2-TMD-A681F vs. SNAP-mGluR2-TMD-A685G	0.839149
One-way ANOVA	0.000650782
Tukey-Kramer
SNAP-mGluR3-TMD vs. SNAP-mGluR3-TMD-S686A	0.000394277
SNAP-mGluR3-TMD vs. SNAP-mGluR3-TMD-F690A	0.0102863
SNAP-mGluR3-TMD vs. SNAP-mGluR3-TMD-G694A	0.0260245
SNAP-mGluR3-TMD-S686A vs. SNAP-mGluR3-TMD-F690A	0.492072
SNAP-mGluR3-TMD-S686A vs. SNAP-mGluR3-TMD-G694A	0.275398
SNAP-mGluR3-TMD-F690A vs. SNAP-mGluR3-TMD-G694A	0.97357
Part C
One-way ANOVA	0.340311

## Sheet: Fig 2 - FS 5 Data
Figure 2 - figure supplement 5
Part B
	% Dimerization
Experiment Day	SNAP-mGluR2-TMD	SNAP-mGluR2-TMD-AA695SV
1	80	77.037
1	73.3333	68.8571
1	62.5926	65.2577
2	70	69.646
2	80	81.5663
2		90
Part C
	Surface Expression
Measurement	SNAP-mGluR2-TMD	SNAP-mGluR2-TMD-AA695SV
1	0.640655	0.732944
2	0.948365	1.38032
3	0.992831	1.03145
4	0.893469	0.736202
5	0.989874	1.08363
6	1.48076	1.0442
7	1.22942	0.585586
8	0.824623	0.50479
Part F
	% Dimerization
Experiment Day	SNAP-mGluR2-TMD	SNAP-mGluR2-TMD-F584I-G587T	SNAP-mGluR2-TMD-A726S-G730I-A733T
1	78.6792	87.619	84.0594
1	81.8919	80.1961	91.2346
1	78.6076	83.5065	82.3913
2	71.6327	82.0635	77.5
2	80.566	80.6667	77.5912
2	81.4286	78.3721	75.7143
Part G
	Surface Expression
Measurement	SNAP-mGluR2-TMD	SNAP-mGluR2-TMD-F584I-G587T	SNAP-mGluR2-TMD-A726S-G730I-A733T
1	0.730261	1.19871	1.05643
2	1.08101	0.528144	0.648748
3	1.13169	1.50049	0.981058
4	1.01843	1.19756	0.907478
5	1.0222	0.614711	1.39645
6	1.15085	1.16552	1.53723
7	1.05091	0.545341	0.8544
8	0.814635	0.703034	1.14601

## Sheet: Fig 2 - FS 5 Statistics
Figure 2 - figure supplement 5	p value
Part B	0.670221
Unpaired t-test
Part C	0.428941
Unpaired t-test
Part F	0.416624
One-way ANOVA
Part G	0.649986
One-way ANOVA

## Sheet: Fig 2 - FS 6 Data
Figure 2 - figure supplement 6
Part D
	% Dimerization
Experiment Day	SNAP-mGluR2	SNAP-mGluR2-mGluR3TMD	SNAP-mGluR2-3xTM4	SNAP-mGluR3	SNAP-mGluR3-mGluR2TMD	SNAP-mGluR3-3xTM4
1	101.579	94.4776	98.6538	99.3923	105.385	113.404
1	111.26	97.0175	99.2896	101.111	86.4539	99
1	94	94.0541	103.253	94.6632	83.75	112.124
2	99.589	90	96.8966	111.739	96.2069	113.729
2	102.644	98	90.7299	113.077	104.34	100.204
2	99.8039	98.7218	90	88.7952	95.7692	98.5714
Part E
	Surface Expression
Measurement	SNAP-mGluR2	SNAP-mGluR2-mGluR3TMD	SNAP-mGluR2-3xTM4	SNAP-mGluR3	SNAP-mGluR3-mGluR2TMD	SNAP-mGluR3-3xTM4
1	1.22535	0.769895	0.654265	1.06563	0.707233	1.23704
2	1.01373	1.13596	1.02364	1.07229	0.729346	0.680837
3	0.445184	0.790175	0.414781	0.85879	0.735464	0.668832
4	1.26602	0.690669	0.862281	1.29755	0.948357	1.40881
5	0.334302	0.842217	0.903928	0.881249	1.0048	0.924156
6	1.46939	0.851434	0.826982	0.771851	1.03761	1.20569
7	0.978475	0.946281	0.724145	0.838857	0.603411	1.35343
8	1.26755	0.889516	0.806089	0.54375	0.675316	1.31008

## Sheet: Fig 2 - FS 6 Statistics
Figure 2 - figure supplement 6
Part D	p value
One-way ANOVA	0.0671198
Part E
One-way ANOVA	0.124174
