# Supplementary material for: Differences in interactions between transmembrane domains tune the activation of metabotropic glutamate receptors
Source: eLife. 2021 Apr 21;10:e67027. doi: 10.7554/eLife.67027 (PMC8102066; doi:10.7554/eLife.67027)
Supplement: Figure 3—source data 1. [file elife-67027-fig3-data1.xlsx]

## Sheet: Fig 3 Data
Figure 3
Part B
	mGluR2
Glutamate concentration	Calcium response amplitude
10 nM	0	0
100 nM	0	0	0	0
300 nM	0.131328	0.067349
1 uM	0.199815	0.371272	0.561033	0.372158	0.240963	0.171693	0.312968	0.240548	0.10052	0.204014	0.194282	0.432124	0.2301
3 uM	0.865811	0.671239	0.744732	0.745592	0.57	0.57	0.812111	0.772691	0.677574
10 uM	0.926107	0.823656	0.955279	0.734249	0.662071	0.921449	0.986457	0.883176	0.934199	0.888695	0.950965	0.725694
100 uM	1	0.94622	0.99833	1	1	0.98
1 mM	1	1	1	1	1	1	1	1	1	1	1	1
	mGluR2-3xTM4
Glutamate concentration	Calcium response amplitude
1 nM	0	0
10 nM	0	0	0
100 nM	0.258317	0.301936	0.144464
300 nM	0.485096	0.414897
1 uM	0.540009	0.697791	0.618856	0.634584	0.753479
3 uM	0.980775	0.889054	0.89715	0.801125	0.779516	1.01292
10 uM	0.953391	1	0.991789
100 uM	0.964083	0.985542	1	1
1 mM	1	1	1	1	1	1
Part C
Construct	Glutamate EC50 (micromolar)
mGluR2	1.68
mGluR2-A677S	1.94
mGluR2-A681F	1.79
mGluR2-A685G	2.01
mGluR2-3xTM4	0.41
mGluR2-TM1	2.5
mGluR2-TM5	2.05
Part E
	mGluR3
Glutamate concentration	Calcium response amplitude
1 nM	0	0	0
10 nM	0	0	0
100 nM	0.229829	0.23486
1 uM	0.608381	0.64027	0.669987	0.551839
2 uM	0.659983	0.774537
3 uM	0.82843	0.78865
5 uM	0.885861	0.945772	0.768049
10 uM	0.990547	0.946983	0.917687
1 mM	1	1	1
	mGluR3-3xTM4
Glutamate concentration	Calcium response amplitude
100 nM	0.028	0
300 nM	0.1078	0	0	0.11
1 uM	0.19073	0.19	0.19
3 uM	0.3245	0.2	0.21	0.352
10 uM	0.27	0.56296	0.69
100 uM	0.88814	0.80693
500 uM	0.99
1 mM	1	1	1
Part F
Construct	Glutamate EC50 (micromolar)
mGluR3	0.56
mGluR3-S686A	5.11
mGluR3-F690A	9.59
mGluR3-G694A	4.65
mGluR3-3xTM4	10.99
Part G
	mGluR2
LY487379 concentration	Calcium response amplitude
1 nM	0	0	0
10 nM	0	0	0
100 nM	0.086532	0	0.0700987	0.327959
1 uM	0.532686	0.490534	0.68	0.502449	0.506875	0.45586
3 uM	0.703872	0.578534	0.724045
10 uM	0.614372	0.5631	0.774649	0.919862	0.73671	0.686413
100 uM	0.762693	0.823341	0.729999	0.740811
	mGluR2-3xTM4
LY487379 concentration	Calcium response amplitude
1 nM	0	0	0
10 nM	0.139552	0.161764	0.091955	0
100 nM	0.270265	0.191747		0.251194
1 uM	0.798801	0.822695	0.815341	0.655205
3 uM	0.861437	0.893002
10 uM	0.93986	0.925172	0.859037
100 uM	0.974371	0.912404	0.985786
Part H
	mGluR2
Glutamate concentration	Calcium response amplitude
10 nM	0	0
100 nM	0	0	0	0
300 nM	0.131328	0.067349
1 uM	0.199815	0.371272	0.561033	0.372158	0.240963	0.171693	0.312968	0.240548	0.10052	0.204014	0.194282	0.432124	0.2301
3 uM	0.865811	0.671239	0.744732	0.745592	0.57	0.57	0.812111	0.772691	0.677574
10 uM	0.926107	0.823656	0.955279	0.734249	0.662071	0.921449	0.986457	0.883176	0.934199	0.888695	0.950965	0.725694
100 uM	1	0.94622	0.99833	1	1	0.98
1 mM	1	1	1	1	1	1	1	1	1	1	1	1
	mGluR2-3xTM4_W
Glutamate concentration	Calcium response amplitude
100 nM	0	0	0
1 uM	0	0.083632	0.04
10 uM	0.549	0.508
100 uM	1	0.992	0.755
1 mM	1	1	1
Part I
	mGluR3
Glutamate concentration	Calcium response amplitude
1 nM	0	0	0
10 nM	0	0	0
100 nM	0.229829	0.23486
1 uM	0.608381	0.64027	0.669987	0.551839
2 uM	0.659983	0.774537
3 uM	0.82843	0.78865
5 uM	0.885861	0.945772	0.768049
10 uM	0.990547	0.946983	0.917687
1 mM	1	1	1
	mGluR3-3xTM4_W
Glutamate concentration	Calcium response amplitude
10 nM	0	0
100 nM	0	0
1 uM	0.1939	0.0922	0.064	0
10 uM	0.198	0.2844	0.118	0.224
100 uM	0.413	0.496
1 mM	0.862
10 mM	1

## Sheet: Fig 3 Statistics
Figure 3
Part B	p value
Two-way ANOVA
mGluR2 vs mGluR2-3xTM4	5.2e-10
Part C
Two-way ANOVA
mGluR2 vs mGluR2-3xTM4	5.2e-10
Part E
Two-way ANOVA
mGluR3 vs mGluR3-3xTM4	3.6e-10
Part F
Two-way ANOVA
mGluR3 vs mGluR3-S686A	2.2e-08
mGluR3 vs mGluR3-F690A	2.6e-14
mGluR3 vs mGluR3-G694A	4.8e-10
mGluR3 vs mGluR3-3xTM4	3.6e-10
Part G
Two-way ANOVA
mGluR2 vs mGluR2-3xTM4	1.3e-07
Part H
Two-way ANOVA
mGluR2 vs mGluR2-3xTM4_W	0.00087
Part I
Two-way ANOVA
mGluR3 vs mGluR3-3xTM4_W	1.2e-10

## Sheet: Fig 3 - FS 1 Data
Figure 3 - figure supplement 1
Part B
	mGluR2
Glutamate concentration	Calcium response amplitude
10 nM	0	0
100 nM	0	0	0	0
300 nM	0.131328	0.067349
1 uM	0.199815	0.371272	0.561033	0.372158	0.240963	0.171693	0.312968	0.240548	0.10052	0.204014	0.194282	0.432124	0.2301
3 uM	0.865811	0.671239	0.744732	0.745592	0.57	0.57	0.812111	0.772691	0.677574
10 uM	0.926107	0.823656	0.955279	0.734249	0.662071	0.921449	0.986457	0.883176	0.934199	0.888695	0.950965	0.725694
100 uM	1	0.94622	0.99833	1	1	0.98
1 mM	1	1	1	1	1	1	1	1	1	1	1	1
	mGluR3
Glutamate concentration	Calcium response amplitude
1 nM	0	0	0
10 nM	0	0	0
100 nM	0.229829	0.23486
1 uM	0.608381	0.64027	0.669987	0.551839
2 uM	0.659983	0.774537
3 uM	0.82843	0.78865
5 uM	0.885861	0.945772	0.768049
10 uM	0.990547	0.946983	0.917687
1 mM	1	1	1
Part C
	mGluR2
Glutamate concentration	Calcium response amplitude
10 nM	0	0
100 nM	0	0	0	0
300 nM	0.131328	0.067349
1 uM	0.199815	0.371272	0.561033	0.372158	0.240963	0.171693	0.312968	0.240548	0.10052	0.204014	0.194282	0.432124	0.2301
3 uM	0.865811	0.671239	0.744732	0.745592	0.57	0.57	0.812111	0.772691	0.677574
10 uM	0.926107	0.823656	0.955279	0.734249	0.662071	0.921449	0.986457	0.883176	0.934199	0.888695	0.950965	0.725694
100 uM	1	0.94622	0.99833	1	1	0.98
1 mM	1	1	1	1	1	1	1	1	1	1	1	1
	mGluR2-A677S
Glutamate concentration	Calcium response amplitude
100 nM	0	0	0	0.02
1 uM	0.17	0.22
3 uM	0.74	0.69
10 uM	0.83	0.99	1.01	0.88
100 uM	1	1	1
1 mM	1	1	1
	mGluR2-A681F
Glutamate concentration	Calcium response amplitude
100 nM	0.01	0.02	0	0
1 uM	0.25	0.07
3 uM	0.86	0.8	0.73
10 uM	0.85	0.99	0.93
100 uM	1	1	1
1 mM	1	1	1
	mGluR2-A685G
Glutamate concentration	Calcium response amplitude
100 nM	0.01	0	0
1 uM	0.14	0.15
3 uM	0.72	0.75
10 uM	1	0.79
1 mM	1	1	1
Part D
	mGluR3
Glutamate concentration	Calcium response amplitude
1 nM	0	0	0
10 nM	0	0	0
100 nM	0.229829	0.23486
1 uM	0.608381	0.64027	0.669987	0.551839
2 uM	0.659983	0.774537
3 uM	0.82843	0.78865
5 uM	0.885861	0.945772	0.768049
10 uM	0.990547	0.946983	0.917687
1 mM	1	1	1
	mGluR3-S686A
Glutamate concentration	Calcium response amplitude
10 nM	0	0
100 nM	0.07	0
1 uM	0.2	0.08
10 uM	0.75	0.64
100 uM	1
1 mM	1	1
	mGluR3-F681A
Glutamate concentration	Calcium response amplitude
10 nM	0	0	0
100 nM	0	0	0
1 uM	0.08	0.02
3 uM	0.33	0.27
10 uM	0.4	0.44	0.57	0.58
100 uM	1	0.86
1 mM	1	1	1
	mGluR3-G694A
Glutamate concentration	Calcium response amplitude
10 nM	0	0
100 nM	0.05	0
1 uM	0	0.17	0.14
3 uM	0.27	0.4	0.18
5 uM	0.5	0.59	0.67	0.5
10 uM	0.98	0.98
100 uM	1	1	1
1 mM	1	1	1
Part F
	mGluR2
Glutamate concentration	GIRK current amplitude
10 nM	0
100 nM	0	0.0483261	0.0355604	0
1 uM	0.679436	0.596217	0.235318	0.573788	0.362759	0.115676	0.494665
10 uM	0.889279	0.826811	0.74911	0.878771	0.951813
100 uM	0.941949	1.14982	0.849111	0.991003
1 mM	1	1	1	1	1	1	1
	mGluR2 3xTM4
Glutamate concentration	GIRK current amplitude
10 nM	0	0
100 nM	0.0526637	0.0773359	0	0.0319015	0.0818017	0.00383755	0.0193206	0.00557314	0.012386	0.0182147	0.0041541
1 uM	0.625568	0.317793	0.828331	0.865276	0.664844	0.677097	0.61778	0.434441
10 uM	1.2923	0.910578	0.661321	0.839552	0.907831	1.03989	1.20061	0.639919
100 uM	0.954869	1.14845	1.10134
1 mM	1	1	1	1	1	1	1	1	1	1	1
Part G
	mGluR3
Glutamate concentration	GIRK current amplitude
10 nM	0.0397768	0.041345	0
100 nM	0.154526	0.144998	0.126238	0.149308
1 uM	0.54073	0.994864	0.691999
10 uM	0.81753	1.14968	0.769926	0.855788	1.00684
100 uM	1	1	1	1	1
	mGluR3 3xTM4
Glutamate concentration	GIRK current amplitude
10 nM	0	0
100 nM	0.0804184	0	0
1 uM	0.215603	0.465022	0.617396	0.442207	0.315463	0.578683
10 uM	0.694798	0.866011
100 uM	1.07795	0.76709	0.805604
1mM	1	1	1	1	1	1
Part I
	mGluR2
Glutamate concentration	Calcium response amplitude
10 nM	0	0
100 nM	0	0	0	0
300 nM	0.131328	0.067349
1 uM	0.199815	0.371272	0.561033	0.372158	0.240963	0.171693	0.312968	0.240548	0.10052	0.204014	0.194282	0.432124	0.2301
3 uM	0.865811	0.671239	0.744732	0.745592	0.57	0.57	0.812111	0.772691	0.677574
10 uM	0.926107	0.823656	0.955279	0.734249	0.662071	0.921449	0.986457	0.883176	0.934199	0.888695	0.950965	0.725694
100 uM	1	0.94622	0.99833	1	1	0.98
1 mM	1	1	1	1	1	1	1	1	1	1	1	1
	mGluR2-AA695SV
Glutamate concentration	Calcium response amplitude
10 nM	0
100 nM	0	0
1 uM	0	0.15
10 uM	0.72	0.97
100 uM	1	1
1 mM	1	1
	mGluR2-F584I-G587T
Glutamate concentration	Calcium response amplitude
100 nM	0	0
1 uM	0.1	0.24	0.26
3 uM	0.62	0.57	0.48
10 uM	0.87	0.71	0.81
100 uM	0.97	0.92
1 mM	1	1	1
	mGluR2-A726S-G730I-A733T
Glutamate concentration	Calcium response amplitude
100 nM	0
1 uM	0.12	0.08	0.26	0.43
3 uM	0.71	0.6
10 uM	0.93	0.97	0.56
100 uM	1	1
1 mM	1	1

## Sheet: Fig 3 - FS 1 Statistics
Figure 3 - figure supplement 1
Part B	p value
Two-way ANOVA
mGluR2 vs mGluR3	6.4e-05
Part C
Two-way ANOVA
mGluR2 vs mGluR2-A677S	0.96
mGluR2 vs mGluR2-A681F	0.81
mGluR2 vs mGluR2-A685G	0.64
Part D
Two-way ANOVA
mGluR3 vs mGluR3-S686A	2.2e-08
mGluR3 vs mGluR3-F690A	2.6e-14
mGluR3 vs mGluR3-G694A	4.9e-10
Part F
Two-way ANOVA
mGluR2 vs mGluR2-3xTM4	0.0206
Part G
Two-way ANOVA
mGluR3 vs mGluR3-3xTM4	0.0025
Part I
Two-way ANOVA
mGluR2 vs mGluR2-AA695SV	0.33
mGluR2 vs mGluR2-F584I-G587T	0.29
mGluR2 vs mGluR2-A726S-G730I-A733T	0.71

## Sheet: Fig 3 - FS 2 Data
Figure 3 - figure supplement 2
Part A
	% Dimerization
Experiment Day	SNAP-mGluR2-TMD	SNAP-mGluR2-TMD-3xTM4_W	SNAP-mGluR3-TMD	SNAP-mGluR3-TMD-3xTM4_W
1	78.6792	36.6258	46.5217	39.6
1	81.8919	51.0526	39.2754	46.8966
1	89.1736	32.953	46.8047	34.2478
2	90	45.6962	49.0909	62.7273
2	80.566	36.3768	43.2609	38
2	81.4286	54.6154	52.5954	50.6061
3		38.7179
3		27.8049
3		26.8098
Part B
	Surface Expression
Measurement	SNAP-mGluR2-TMD	SNAP-mGluR2-TMD-3xTM4_W	SNAP-mGluR3-TMD	SNAP-mGluR3-TMD-3xTM4_W
1	0.767979	0.716359	0.737434	0.518189
2	1.13684	0.509063	0.70438	0.920922
3	0.53499	0.37393	0.543605	0.471396
4	1.07104	1.21118	0.885191	1.08176
5	1.1866	1.08527	1.04912	0.729145
6	1.77505	0.942941	0.799703	0.692887
7	0.538987	0.9364	0.945695	0.754678
8	0.988509	1.70727	0.878098	1.04377
Part C
	Surface Expression
Measurement	SNAP-mGluR2	SNAP-mGluR2-3xTM4_W	SNAP-mGluR3	SNAP-mGluR3-3xTM4_W
1	1.0076	2.05198	1.30952	0.683785
2	0.396212	1.62913	1.35021	1.36178
3	0.740769	1.87128	1.62431	1.5098
4	0.878478	0.747399	1.53024	0.938542
5	1.52528	0.685668	1.21036	1.37331
6	1.25967	0.916434	1.75141	1.66362
7	1.19199	0.536233	0.677906	0.612615

## Sheet: Fig 3 - FS 2 Statistics
Figure 3 - figure supplement 2
Part A	p value
One-way ANOVA	2.51005e-09
Tukey-Kramer
SNAP-mGluR2-TMD vs. SNAP-mGluR2-TMD-3xTM4_W	2.00765e-09
SNAP-mGluR2-TMD vs. SNAP-mGluR3-TMD	2.66731e-07
SNAP-mGluR2-TMD vs. SNAP-mGluR3-TMD-3xTM4_W	1.7647e-07
SNAP-mGluR2-TMD-3xTM4_W vs. SNAP-mGluR3-TMD	0.344771
SNAP-mGluR2-TMD-3xTM4_W vs. SNAP-mGluR3-TMD-3xTM4_W	0.458842
SNAP-mGluR3-TMD vs. SNAP-mGluR3-TMD-3xTM4_W	0.997338
Part B
One-way ANOVA	0.488216
Part C
One-way ANOVA	0.559865
