# Supplementary material for: Differences in interactions between transmembrane domains tune the activation of metabotropic glutamate receptors
Source: eLife. 2021 Apr 21;10:e67027. doi: 10.7554/eLife.67027 (PMC8102066; doi:10.7554/eLife.67027)
Supplement: Figure 4—source data 1. [file elife-67027-fig4-data1.xlsx]

## Sheet: Fig 4 Data
Figure 4
Part C
	mGluR2
Glutamate concentration	FRET response amplitude
10 nM	0	0	0	0	0	0
100 nM	0	0	0	0	0	0	0	0
1 uM	0.078624	0	0.061788	0.084312	0.092682	0	0.041638	0.040586	0.056817	0	0	0.0625176	0	0.0312588
3 uM	0.147939	0.140283	0.234703	0.051008	0.054931	0.015238	0.047986
10 uM	0.501061	0.338836	0.292998	0.291856	0.350725	0.307667	0.220708	0.597648	0.294573	0.612584	0.416256	0.220708	0.328442	0.326756	0.17905	0.292333	0.266046
100 uM	0.968377	0.964946	0.945092	0.920302	1.03809	0.985427	1.01176
1 mM	1	1	1	1	1	1
	mGluR3
Glutamate concentration	FRET response amplitude
1 nM	0	0
10 nM	0.189093	0	0.122385	0.004368	0.052801	0.204305
100 nM	0.244743	0.275762	0.299676	0.174697	0.550145	0.254942
1 uM	0.655752	0.830982	0.949837	0.967274	0.925267	0.79183	0.726379
10 uM	0.802826	0.94935	0.969318	1.05481	0.981609	0.872191
100 uM	0.993612	0.972131	0.957142	1	1
1 mM	1	1	1
Part E
	Maximum % Inhibition
Construct	mGluR2	mGluR2	mGluR2	mGluR2	mGluR3	mGluR3	mGluR3	mGluR3
Drug	LY 341495	LY 341495	MNI 137	MNI 137	LY 341495	LY 341495	MNI 137	MNI 137
Experiment	Function	FRET	Function	FRET	Function	FRET	Function	FRET
	100	100	100	29.8	100	95.4	100	46
	100	100	100	42.4	100	95.2	100	59.9
		100	100	23.8	100	88.9	100	86.6
		100					100	35.6
							100	12.8
								39.3
								29.3
								33.3
Part F
	% Response
Construct	mGluR2	mGluR2
Drug	LY 487379	LY 487379
Experiment	Function	FRET
	76.3	32.9
	82.3	25.6
	73	42.1
Part H
	mGluR2
Glutamate concentration	FRET response amplitude
10 nM	0	0	0	0	0	0
100 nM	0	0	0	0	0	0	0	0
1 uM	0.078624	0	0.061788	0.084312	0.092682	0	0.041638	0.040586	0.056817	0	0	0.0625176	0	0.0312588
3 uM	0.147939	0.140283	0.234703	0.051008	0.054931	0.015238	0.047986
10 uM	0.501061	0.338836	0.292998	0.291856	0.350725	0.307667	0.220708	0.597648	0.294573	0.612584	0.416256	0.220708	0.328442	0.326756	0.17905	0.292333	0.266046
100 uM	0.968377	0.964946	0.945092	0.920302	1.03809	0.985427	1.01176
1 mM	1	1	1	1	1	1
	mGluR2-3xTM4
Glutamate concentration	FRET response amplitude
10 nM	0	0	0	0
100 nM	0.0446
1 uM	0.136138	0.097201	0.109476
3 uM	0.318435	0.15
10 uM	0.889885	0.705353
100 uM	1	1	1
1 mM	1	1	1	1	1
Part I
	mGluR3
Glutamate concentration	FRET response amplitude
1 nM	0	0
10 nM	0.189093	0	0.122385	0.004368	0.052801	0.204305
100 nM	0.244743	0.275762	0.299676	0.174697	0.550145	0.254942
1 uM	0.655752	0.830982	0.949837	0.967274	0.925267	0.79183	0.726379
10 uM	0.802826	0.94935	0.969318	1.05481	0.981609	0.872191
100 uM	0.993612	0.972131	0.957142	1	1
1 mM	1	1	1
	mGluR3-3xTM4
Glutamate concentration	FRET response amplitude
1 nM	0	0	0
10 nM	0	0	0.261096
100 nM	0.202281	0.121	0.166457	0.159	0.131533	0.205054
1 uM	0.694417	0.423	0.645113	0.651	0.655588
10 uM	0.75499	0.74787	0.98922	0.885474
100 uM	0.80395	0.963306
1 mM	1	1	1
Part K
	Basal LY 341495 FRET Response (%)
Construct	mGluR3	mGluR3-3xTM4
	50.6	14.3
	42.3	16
	32.4	24
	50.8
Part L	Basal Activity (%)
Construct	mGluR3	mGluR3-3xTM4
	6.3	10.5
	29.2	0
	16.5	10.1
	19.3	30.6
	46.7	5.4
	28.1	4.3
	20.6	15.1
	34.3	0
Part M	Basal Activity (%)
Construct	mGluR2	mGluR2-3xTM4
	12.4	16.4
	12.5	19.4
	4.7	11.4
	17.5	14.2
	7.3	33
	26.6	56.1
	30.6	8.6
	5.3	19.5
	19	59.3
	10.3	8.4
	15.2	23.7
	12.7	26.9
		35.4
		25.7

## Sheet: Fig 4 Statistics
Figure 4
Part E	p value
Unpaired t-test
MNI inhibition in FRET vs function for mGluR2	0.0064
MNI inhibition in FRET vs function for mGluR3	0.013
Part F
Unpaired t-test
LY48 response in FRET vs function for mGluR2	0.0033
Part H
Two-way ANOVA
mGluR2 vs mGluR2-3xTM4	1.7e-06
Part I
Two-way ANOVA
mGluR3 vs mGluR3-3xTM4	0.0083
Part K
Unpaired t-test
mGluR3 vs mGluR3-3xTM4	0.0048
Part L
Unpaired t-test
mGluR3 vs mGluR3-3xTM4	0.0150122
Part M
Unpaired t-test
mGluR3 vs mGluR3-3xTM4	0.0334264

## Sheet: Fig 4 - FS 1 Data
Figure 4 - figure supplement 1
Part B
	mGluR2
Glutamate concentration	FRET response amplitude
10 nM	0	0
100 nM	0	0
1 uM	0.06	0.06	0.03	0.08
3 uM	0.13	0.11	0.12	0.09
10 uM	0.41	0.51	0.46	0.3
100 uM	0.98	1	0.985
1 mM	1	1	1	1
	mGluR2-3xTM4
Glutamate concentration	FRET response amplitude
10 nM	0	0
100 nM	0	0
1 uM	0.026655	0.0087
3 uM	0.103053	0.097
10 uM	0.491494	0.373662
100 uM	0.997251	0.973883
1 mM	1	1
	mGluR3
Glutamate concentration	FRET response amplitude
1 nM	0	0	0
10 nM	0	0	0
100 nM	0.196101	0.070748	0.176244
1 uM	0.66	0.526962
3 uM	1	0.63
10 uM	1	0.860502
100 uM	1	1	1
1 mM
	mGluR3-3xTM4
Glutamate concentration	FRET response amplitude
1 nM	0	0	0
10 nM	0	0	0
100 nM	0.194473	0.072693
1 uM	0.62759	0.583857
3 uM	0.777553	0.903876
10 uM	0.985593	0.958985	1.04882
1 mM	1	1	1
Part D
	Basal LBD FRET (%)
Experiment Day	SNAP-mGluR2	SNAP-mGluR2-3xTM4	SNAP-mGluR3	SNAP-mGluR3-3xTM4
1	0	0	20	25
1	0	0	30	12
2	0	0	23	23
2	0	0	24	34

## Sheet: Fig 4 - FS 2 Data
Figure 4 - figure supplement 2
Part A
	FRET Change
Measurement	2:1	1:1	1:2	1:3	1:5
1	0.0031	0.006	0.005	0.045	0.024
2	0.0086	0.008	0.011	0.044	0.022
3		0.007	0.0165	0.0375	0.031
Part C
	Max FRET Change
Experiment Day	mGluR2	mGluR3
1	0.0068	0.056
1	0.0099	0.0383
1	0.02548	0.04311
2	0.020951	0.0592
2	0.028	0.062
3	0.036	0.0322
3		0.056
3		0.047

## Sheet: Fig 4 - FS 2 Statistics
Figure 4 - figure supplement 2
Part A
Unpaired t-test	p value
1:2 vs 1:3	0.00231626
1:3 vs 1:5	0.0107033
Part C
Unpaired t-test	0.000660572

## Sheet: Fig 4 - FS 4 Data
Figure 4 - figure supplement 4
Part A
Basal FRET Response (%)
LY 341495	MNI 137
33.8	0
32	19.5
50.6	7.8
42.3	52
50.8	13.3
	15.2
	5
	5.6
	0
	0
Part D
Basal Activity (%)
LY 341495	MNI 137
6.3	24.3
29.2	16.3
16.5	23.1
19.3	12.9
46.7	5.1
28.1	22.8
20.6	23.8
34.3

## Sheet: Fig 4 - FS 4 Statistics
Figure 4 - figure supplement 4
Part A	p value
Unpaired t-test	0.000434731
Part D
Unpaired t-test	0.212316
