# Supplementary material for: Differences in interactions between transmembrane domains tune the activation of metabotropic glutamate receptors
Source: eLife. 2021 Apr 21;10:e67027. doi: 10.7554/eLife.67027 (PMC8102066; doi:10.7554/eLife.67027)
Supplement: Figure 5—source data 1. [file elife-67027-fig5-data1.xlsx]

## Sheet: Fig 5 Data
Figure 5
Part B
	% Dimerization
Experiment Day	SNAP-mGluR2-TMD	SNAP-mGluR2-TMD-I779A	SNAP-mGluR3-TMD	SNAP-mGluR3-TMD-I788A
1	78.6792	65.2475	46.5217	33.4783
1	81.8919	70.2395	39.2754	31.6667
1	89.1736	62.3926	46.8047	41.4286
2	71.6327	42.7197	49.0909	40.7463
2	80.566	55.7407	43.2609	24.375
2	81.4286	50.6838	52.5954	41.0949
2				34.0945
Part C
	Surface Expression
Measurement	SNAP-mGluR2-TMD	SNAP-mGluR2-TMD-I779A	SNAP-mGluR3-TMD	SNAP-mGluR3-TMD-I788A
1	0.815277	1.30954	0.78285	1.51321
2	1.20686	0.875857	0.747761	0.438549
3	0.567938	1.14348	1.24989	0.892827
4	1.137	1.0964	0.939707	1.14938
5	1.05824	0.620838	1.11373	0.252068
6	1.56452	1.01242	0.848954	0.260219
7	0.540291	0.905107	0.680906	0.882218
8	1.10987	1.41085	1.05342	0.664934
Part D
	mGluR2
Glutamate concentration	Calcium response amplitude
10 nM	0	0
100 nM	0	0	0	0
300 nM	0.131328	0.067349
1 uM	0.199815	0.371272	0.561033	0.372158	0.240963	0.171693	0.312968	0.240548	0.10052	0.204014	0.194282	0.432124	0.2301
3 uM	0.865811	0.671239	0.744732	0.745592	0.57	0.57	0.812111	0.772691	0.677574
10 uM	0.926107	0.823656	0.955279	0.734249	0.662071	0.921449	0.986457	0.883176	0.934199	0.888695	0.950965	0.725694
100 uM	1	0.94622	0.99833	1	1	0.98
1 mM	1	1	1	1	1	1	1	1	1	1	1	1
	mGluR2-I779A
Glutamate concentration	Calcium response amplitude
10 nM	0	0
100 nM	0	0
1 uM	0	0	0
10 uM	0	0.21	0.25728	0.23
100 uM	0.75	0.9	0.77	0.82
1 mM	1	1	1
Part E
	mGluR3
Glutamate concentration	Calcium response amplitude
1 nM	0	0	0
10 nM	0	0	0
100 nM	0.229829	0.23486
1 uM	0.608381	0.64027	0.669987	0.551839
2 uM	0.659983	0.774537
3 uM	0.82843	0.78865
5 uM	0.885861	0.945772	0.768049
10 uM	0.990547	0.946983	0.917687
1 mM	1	1	1
	mGluR3-I788A
Glutamate concentration	Calcium response amplitude
10 nM	0	0	0
100 nM	0.148393	0.099595	0.066
1 uM	0.603	0.657385	0.5547
10 uM	0.96726	1	0.8603
100 uM	1
1 mM	1	1	1
Part F
Construct	Glutamate EC50 (micromolar)
mGluR2-I779A	18
mGluR2-I779W	4.3
mGluR2-P778A	0.85
mGluR2-P778A-I779A	5.1
mGluR3-I788A	10.4
Part G
	mGluR2
LY487379 concentration	Calcium response amplitude
1 nM	0	0	0
10 nM	0	0	0
100 nM	0.086532	0	0.0700987	0.327959
1 uM	0.532686	0.490534	0.68	0.502449	0.506875	0.45586
3 uM	0.703872	0.578534	0.724045
10 uM	0.614372	0.5631	0.774649	0.919862	0.73671	0.686413
100 uM	0.762693	0.823341	0.729999	0.740811
	mGluR2-I779A
LY487379 concentration	Calcium response amplitude
100 nM	0	0
1 uM	0	0.12	0.02
3 uM	0.21	0.14
10 uM	0.34	0.27
100 uM	0.49	0.44
Part H
	mGluR2
Glutamate concentration	FRET response amplitude
10 nM	0	0	0	0	0	0
100 nM	0	0	0	0	0	0	0	0
1 uM	0.078624	0	0.061788	0.084312	0.092682	0	0.041638	0.040586	0.056817	0	0	0.0625176	0	0.0312588
3 uM	0.147939	0.140283	0.234703	0.051008	0.054931	0.015238	0.047986
10 uM	0.501061	0.338836	0.292998	0.291856	0.350725	0.307667	0.220708	0.597648	0.294573	0.612584	0.416256	0.220708	0.328442	0.326756	0.17905	0.292333	0.266046
100 uM	0.968377	0.964946	0.945092	0.920302	1.03809	0.985427	1.01176
1 mM	1	1	1	1	1	1
	mGluR2-I779A
Glutamate concentration	FRET response amplitude
10 nM	0	0
100 nM	0	0
1 uM	0	0	0
10 uM	0	0.21	0.25728	0.23
100 uM	0.75	0.9	0.77	0.82
1 mM	1	1	1
Part I
	mGluR3
Glutamate concentration	FRET response amplitude
1 nM	0	0
10 nM	0.189093	0	0.122385	0.004368	0.052801	0.204305
100 nM	0.244743	0.275762	0.299676	0.174697	0.550145	0.254942
1 uM	0.655752	0.830982	0.949837	0.967274	0.925267	0.79183	0.726379
10 uM	0.802826	0.94935	0.969318	1.05481	0.981609	0.872191
100 uM	0.993612	0.972131	0.957142	1	1
1 mM	1	1	1
	mGluR3-I778A
Glutamate concentration	FRET response amplitude
10 nM	0	0	0
100 nM	0.148393	0.099595	0.066
1 uM	0.603	0.657385	0.5547
10 uM	0.96726	1	0.8603
100 uM	1
1 mM	1	1	1

## Sheet: Fig 5 Statistics
Figure 5
Part B	p value
One-way ANOVA	1.15715e-09
Tukey-Kramer
SNAP-mGluR2-TMD vs. SNAP-mGluR2-TMD-I779A	7.20584e-05
SNAP-mGluR2-TMD vs. SNAP-mGluR3-TMD	1.64609e-07
SNAP-mGluR2-TMD vs. SNAP-mGluR3-TMD-I788A	6.77925e-10
SNAP-mGluR2-TMD-I779A vs. SNAP-mGluR3-TMD	0.0411695
SNAP-mGluR2-TMD-I779A vs. SNAP-mGluR3-TMD-I788A	4.86909e-05
SNAP-mGluR3-TMD vs. SNAP-mGluR3-TMD-I788A	0.0451052
Part C
One-way ANOVA	0.303143

## Sheet: Fig 5 - FS 1 Data
Figure 5 - figure supplement 1
Part A
	% Dimerization
Experiment Day	SNAP-mGluR2-TMD	SNAP-mGluR2-TMD-I779A	SNAP-mGluR2-TMD-I779W	SNAP-mGluR2-TMD-P778A	SNAP-mGluR2-TMD-P778A-I779A
1	78.6792	65.2475	65.2688	62.8324	65.3927
1	81.8919	70.2395	68.75	62.5275	54.4444
1	89.1736	62.3926	51.4286	76.0465	54.9682
2	90	42.7197	52.5	68.125	68.8927
2	80.566	55.7407	69.5918	54.2336	51.9048
2	81.4286	50.6838	63.1707	62.2222	52.069
Part B
	Surface Expression
Measurement	SNAP-mGluR2-TMD	SNAP-mGluR2-TMD-I779A	SNAP-mGluR2-TMD-I779W	SNAP-mGluR2-TMD-P778A	SNAP-mGluR2-TMD-P778A-I779A
1	0.977744	1.13569	1.08806	1.17503	0.55361
2	1.44736	0.949089	0.944697	1.30836	1.08549
3	0.681116	1.43695	0.556867	0.836551	1.0219
4	0.556699	1.56852	1.17972	0.805897	0.489575
5	1.51071	1.10956	0.551403	0.617421	1.04824
6	0.881657	1.17457	1.08359	1.12219	1.00585
7	0.686206	1.42674	1.11413	0.78727	0.677938
8	1.25851	1.00421	0.636969	0.661467	0.902684
Part C
	Surface Expression
Measurement	SNAP-mGluR2	SNAP-mGluR2-I779A	SNAP-mGluR2-I779W	SNAP-mGluR2-P778A	SNAP-mGluR2-P778A-I779A	SNAP-mGluR3	SNAP-mGluR3-I788A
1	0.761946	0.897227	1.05716	0.575688	1.1149	0.622897	1.07543
2	0.96928	0.528501	0.469478	0.764893	0.582952	0.538261	0.875203
3	1.74079	0.798953	0.691274	0.675458	0.937444	0.942271	0.763656
4	0.429944	1.16096	0.415499	0.870558	0.560519	0.98065	0.67849
5	0.639772	1.05353	0.991862	0.587774	0.748932	0.637478	0.704834
6	1.08228	1.07987	1.33119	0.589028	0.650111	1.16535	0.974918
7	0.951988	1.27856	0.810149	1.10395	1.10587	1.40079	0.749274
8	1.424	1.10125	0.708277	0.910831	0.993906	1.01864	0.87617
Part D
	mGluR2
Glutamate concentration	Calcium response amplitude
10 nM	0	0
100 nM	0	0	0	0
300 nM	0.131328	0.067349
1 uM	0.199815	0.371272	0.561033	0.372158	0.240963	0.171693	0.312968	0.240548	0.10052	0.204014	0.194282	0.432124	0.2301
3 uM	0.865811	0.671239	0.744732	0.745592	0.57	0.57	0.812111	0.772691	0.677574
10 uM	0.926107	0.823656	0.955279	0.734249	0.662071	0.921449	0.986457	0.883176	0.934199	0.888695	0.950965	0.725694
100 uM	1	0.94622	0.99833	1	1	0.98
1 mM	1	1	1	1	1	1	1	1	1	1	1	1
	mGluR2-I779A
Glutamate concentration	Calcium response amplitude
100 nM	0	0
1 uM	0	0	0.03
3 uM	0.06	0.05
10 uM	0.28	0.3
100 uM	0.75	1	1
1 mM	1	1	1
	mGluR2-I779W
Glutamate concentration	Calcium response amplitude
10 nM	0	0
100 nM	0.050955	0	0.03
1 uM	0	0.142843	0.04832	0	0	0.1
3 uM	0.363583	0.48363	0.1153	0.451073
5 uM	0.519523	0.528519
10 uM	0.95	0.785714	0.943528	0.76	0.79
100 uM	1	1
1 mM	1	1
	mGluR2-P778A
Glutamate concentration	Calcium response amplitude
100 nM	0	0
1 uM	0.48	0.5
10 uM	0.94	0.87
1 mM	1	1
	mGluR2-P778A-I779A
Glutamate concentration	Calcium response amplitude
100 nM	0	0
1 uM	0.18	0.1
3 uM	0.28
10 uM	0.63	0.83
100 uM	0.95	0.96
1 mM	1	1

## Sheet: Fig 5 - FS 1 Statistics
Figure 5 - figure supplement 1
Part A	p value
One-way ANOVA	1.75708e-05
Tukey-Kramer
SNAP-mGluR2-TMD vs. SNAP-mGluR2-TMD-I779A	4.22306e-05
SNAP-mGluR2-TMD vs. SNAP-mGluR2-TMD-I779W	0.000401806
SNAP-mGluR2-TMD vs. SNAP-mGluR2-TMD-P778A	0.00171972
SNAP-mGluR2-TMD vs. SNAP-mGluR2-TMD-P778A-I779A	4.48582e-05
SNAP-mGluR2-TMD-I779A vs. SNAP-mGluR2-TMD-I779W	0.897762
SNAP-mGluR2-TMD-I779A vs. SNAP-mGluR2-TMD-P778A	0.593627
SNAP-mGluR2-TMD-I779A vs. SNAP-mGluR2-TMD-P778A-I779A	1
SNAP-mGluR2-TMD-I779W vs. SNAP-mGluR2-TMD-P778A	0.977652
SNAP-mGluR2-TMD-I779W vs. SNAP-mGluR2-TMD-P778A-I779A	0.906449
SNAP-mGluR2-TMD-P778A vs. SNAP-mGluR2-TMD-P778A-I779A	0.6084
Part B
One-way ANOVA	0.0709697
Part C
One-way ANOVA	0.511862
