# Supplementary material for: Differences in interactions between transmembrane domains tune the activation of metabotropic glutamate receptors
Source: eLife. 2021 Apr 21;10:e67027. doi: 10.7554/eLife.67027 (PMC8102066; doi:10.7554/eLife.67027)
Supplement: Figure 6—source data 1. [file elife-67027-fig6-data1.xlsx]

## Sheet: Fig 6 Data
Figure 6
Part A
	% Dimerization
Experiment Day	SNAP-mGluR2-TMD	SNAP-mGluR2-TMD-3xTM4	SNAP-mGluR2-TMD-I779A	SNAP-mGluR2-TMD-3xTM4-I779A
1	74.0909	51.1765	65.2475	46.9832
1	74.2105	35.7143	70.2395	34.7205
1	78.6792	52.5	62.3926	50.8696
2	81.8919	52.7907	42.7197	42.6316
2	82.728	48.5366	55.7407	52.9032
2	78.888	49.8291	50.6838	36.5116
Part B
	Surface Expression
Measurement	SNAP-mGluR2-TMD	SNAP-mGluR2-TMD-3xTM4	SNAP-mGluR2-TMD-I779A	SNAP-mGluR2-TMD-3xTM4-I779A
1	0.744113	1.18588	0.864316	0.976081
2	1.10152	0.997718	1.21357	0.493225
3	0.597548	0.439408	1.09359	0.693732
4	1.03775	0.831563	1.19373	0.826858
5	1.14973	0.39719	0.844433	0.93279
6	1.71989	1.18371	0.893907	0.398224
7	0.578601	0.781446	1.08582	1.30156
8	1.07085	1.21076	0.764252	1.66062
Part C
	% Dimerization
	MNI 137	TASP	MNI 137	TASP	MNI 137	TASP	MNI 137	TASP
Experiment Day	SNAP-mGluR2-TMD	SNAP-mGluR2-TMD	SNAP-mGluR2-TMD-3xTM4	SNAP-mGluR2-TMD-3xTM4	SNAP-mGluR2-TMD-I779A	SNAP-mGluR2-TMD-I779A	SNAP-mGluR2-TMD-3xTM4-I779A	SNAP-mGluR2-TMD-3xTM4-I779A
1	80.566	70.2395	39.0323	69.6117	60.5202	52.3853	46.8807	47.4468
1	69.3893	67.7143	46.7568	70.2326	74.2105	61.7391	52.9921	39.6644
1	68.4	72.4903	55.625	79.7959	73.3333	61.5447	50.8	50.2941
2	70.292	72.5	64.3802	76.5672	77.7193	62.4638	55.6	36.7532
2	73.871	70.9816	47.9439	71.761	88.9011	33.038	41.0204	47.5342
2	66.8	74.0336	59.0141	76.0927	81.4286	41.5152	44.6875	38.7179
Part D
	% Dimerization
Experiment Day	SNAP-mGluR2-C121A	SNAP-mGluR2-C121A-3xTM4	SNAP-mGluR2-C121A-I779A	SNAP-mGluR2-C121A-3xTM4-I779A
1	84.6809	66.6355	69.1878	39.3976
1	85.5556	80	59.9387	50.6061
1	89.2908	56.6667	71.25	41.6129
1	98.6207	67.9412	56.6667	48.4615
2	88.7952	64.2857	67.4566	50
2	100.976	76.7133	67.9221	51.9355
2	88.7952	70.7947
2	90.7519
Part E
	Surface Expression
Measurement	SNAP-mGluR2-C121A	SNAP-mGluR2-C121A-3xTM4	SNAP-mGluR2-C121A-I779A	SNAP-mGluR2-C121A-3xTM4-I779A
1	0.940369	1.07995	1.26189	1.01426
2	0.840565	0.940369	1.32374	1.03549
3	0.627314	0.711959	1.4195	0.934071
4	0.68903	0.924848	1.11904	1.71458
5	1.33361	0.867487	0.753548	1.35054
6	1.00282	1.38327	1.30702	0.817798
7	1.09139	1.6508	0.436447	1.23549
8	1.4749	1.21772	1.22469	0.654614
Part F
	% Dimerization
	MNI 137	TASP	Glutamate	MNI 137	TASP	Glutamate	MNI 137	TASP	Glutamate	MNI 137	TASP	Glutamate
Experiment Day	SNAP-mGluR2-C121A	SNAP-mGluR2-C121A	SNAP-mGluR2-C121A	SNAP-mGluR2-C121A-3xTM4	SNAP-mGluR2-C121A-3xTM4	SNAP-mGluR2-C121A-3xTM4	SNAP-mGluR2-C121A-I779A	SNAP-mGluR2-C121A-I779A	SNAP-mGluR2-C121A-I779A	SNAP-mGluR2-C121A-3xTM4-I779A	SNAP-mGluR2-C121A-3xTM4-I779A	SNAP-mGluR2-C121A-3xTM4-I779A
1	71.5217	76.1244	86.4467	70	78.3721	89.2593	83.5065	59.2308	54	49.8291	50	44.0541
1	91.3333	87	81.0995	81.0345	85.6044	88.2759	83.5484	63.4694	69.6748	50.7143	40.3497	34.7761
1	86.7742	99.5238	91.3699	62.9064	87.006	81.3386	76.2385	55.8228	69.7619	40.3597	44.8387	55.9341
2	100.303	87.9253	96	67.9221	85.4955	81.9255	73.8095	58.5315	51.0526	45.6701	41.462	49.1304
2	93.6269	80.1235	70.303	62.8477	86.0289	82.7007	83.5673	66.9231	59.6629	37.5248	44.902	47.1429
2	83.8776	78.9952	76.6667	68.4615	88.5915	80.0901	74.6561	63.8462	56.6667	54.7059	44.878	45.1181
Part G
	% Dimerization
Experiment Day	SNAP-mGluR3-C127A	SNAP-mGluR3-C127A-3xTM4	SNAP-mGluR3-C127A-I788A
1	59.1729	79.2019	31.7722
1	57.4157	65.8621	34.4444
1	54.4628	67.9874	36
1	49.375	75.9259	38.2412
2	38.9209	87.1014	44.0541
2	54.1975	71.7391	29.3162
2	39.6124
2	50.1227
Part H
	Surface Expression
Measurement	SNAP-mGluR3-C127A	SNAP-mGluR3-C127A-3xTM4	SNAP-mGluR3-C127A-I788A
1	1.2542	1.19378	1.2859
2	0.926458	0.657025	0.913611
3	0.986484	0.64544	1.29827
4	1.03332	1.35954	0.669464
5	1.20233	0.891835	0.744526
6	1.10497	1.5027	0.863308
7	0.607462	1.28077	1.22233
8	0.884779	0.889282	0.698352
Part I
	% Dimerization
	LY 341495	Glutamate	LY 341495	Glutamate	LY 341495	Glutamate
Experiment Day	SNAP-mGluR3-C127A	SNAP-mGluR3-C127A	SNAP-mGluR3-C127A-3xTM4	SNAP-mGluR3-C127A-3xTM4	SNAP-mGluR3-C127A-I788A	SNAP-mGluR3-C127A-I788A
1	50.2564	71.6327	66.4398	70.851	52.2222	37.9263
1	46.8182	83.233	68.5714	75.7142	51.9718	41.4851
1	44.2858	72.8572	74.2106	66.4332	50.4317	28.7755
2	54.9214	68.2609	71.3794	55.3062	50	34.6429
2	60.7866	70.7018	62.043	68.0646	47.1429	33.2749
2	50.7318	67.6666	74.2105	59.3548	43.125	41.7241

## Sheet: Fig 6 Statistics
Figure 6
Part A	p value
One-way ANOVA	3.94022e-07
Tukey-Kramer
SNAP-mGluR2-TMD vs. SNAP-mGluR2-TMD-3xTM4	3.84909e-06
SNAP-mGluR2-TMD vs. SNAP-mGluR2-TMD-I779A	0.000487418
SNAP-mGluR2-TMD vs. SNAP-mGluR2-TMD-3xTM4-I779A	5.09424e-07
SNAP-mGluR2-TMD-3xTM4 vs. SNAP-mGluR2-TMD-I779A	0.148839
SNAP-mGluR2-TMD-3xTM4 vs. SNAP-mGluR2-TMD-3xTM4-I779A	0.736987
SNAP-mGluR2-TMD-I779A vs. SNAP-mGluR2-TMD-3xTM4-I779A	0.0190039
Part B
One-way ANOVA	0.855564
Part C
One-way ANOVA	4.3909e-16
Tukey-Kramer
SNAP-mGluR2-TMD vs. SNAP-mGluR2-TMD + MNI 137	0.896886
SNAP-mGluR2-TMD vs. SNAP-mGluR2-TMD + TASP	0.875143
SNAP-mGluR2-TMD vs. SNAP-mGluR2-TMD-3xTM4	1.28747e-07
SNAP-mGluR2-TMD vs. SNAP-mGluR2-TMD-3xTM4 + MNI 137	3.77134e-06
SNAP-mGluR2-TMD vs. SNAP-mGluR2-TMD-3xTM4 + TASP	0.996113
SNAP-mGluR2-TMD vs. SNAP-mGluR2-TMD-I779A	0.000541623
SNAP-mGluR2-TMD vs. SNAP-mGluR2-TMD-I779A + MNI 137	0.999988
SNAP-mGluR2-TMD vs. SNAP-mGluR2-TMD-I779A + TASP	3.73747e-06
SNAP-mGluR2-TMD vs. SNAP-mGluR2-TMD-3xTM4-I779A	2.40541e-09
SNAP-mGluR2-TMD vs. SNAP-mGluR2-TMD-3xTM4-I779A + MNI 137	1.60308e-07
SNAP-mGluR2-TMD vs. SNAP-mGluR2-TMD-3xTM4-I779A + TASP	1.26986e-09
SNAP-mGluR2-TMD + MNI 137 vs. SNAP-mGluR2-TMD + TASP	>0.999999999999999
SNAP-mGluR2-TMD + MNI 137 vs. SNAP-mGluR2-TMD-3xTM4	6.22891e-05
SNAP-mGluR2-TMD + MNI 137 vs. SNAP-mGluR2-TMD-3xTM4 + MNI 137	0.0013784
SNAP-mGluR2-TMD + MNI 137 vs. SNAP-mGluR2-TMD-3xTM4 + TASP	0.999985
SNAP-mGluR2-TMD + MNI 137 vs. SNAP-mGluR2-TMD-I779A	0.0780118
SNAP-mGluR2-TMD + MNI 137 vs. SNAP-mGluR2-TMD-I779A + MNI 137	0.995637
SNAP-mGluR2-TMD + MNI 137 vs. SNAP-mGluR2-TMD-I779A + TASP	0.00136743
SNAP-mGluR2-TMD + MNI 137 vs. SNAP-mGluR2-TMD-3xTM4-I779A	1.31615e-06
SNAP-mGluR2-TMD + MNI 137 vs. SNAP-mGluR2-TMD-3xTM4-I779A + MNI 137	7.65845e-05
SNAP-mGluR2-TMD + MNI 137 vs. SNAP-mGluR2-TMD-3xTM4-I779A + TASP	6.94118e-07
SNAP-mGluR2-TMD + TASP vs. SNAP-mGluR2-TMD-3xTM4	7.59247e-05
SNAP-mGluR2-TMD + TASP vs. SNAP-mGluR2-TMD-3xTM4 + MNI 137	0.0016532
SNAP-mGluR2-TMD + TASP vs. SNAP-mGluR2-TMD-3xTM4 + TASP	0.999963
SNAP-mGluR2-TMD + TASP vs. SNAP-mGluR2-TMD-I779A	0.0890859
SNAP-mGluR2-TMD + TASP vs. SNAP-mGluR2-TMD-I779A + MNI 137	0.993363
SNAP-mGluR2-TMD + TASP vs. SNAP-mGluR2-TMD-I779A + TASP	0.00164013
SNAP-mGluR2-TMD + TASP vs. SNAP-mGluR2-TMD-3xTM4-I779A	1.61984e-06
SNAP-mGluR2-TMD + TASP vs. SNAP-mGluR2-TMD-3xTM4-I779A + MNI 137	9.3276e-05
SNAP-mGluR2-TMD + TASP vs. SNAP-mGluR2-TMD-3xTM4-I779A + TASP	8.55028e-07
SNAP-mGluR2-TMD-3xTM4 vs. SNAP-mGluR2-TMD-3xTM4 + MNI 137	0.99918
SNAP-mGluR2-TMD-3xTM4 vs. SNAP-mGluR2-TMD-3xTM4 + TASP	7.10946e-06
SNAP-mGluR2-TMD-3xTM4 vs. SNAP-mGluR2-TMD-I779A	0.546149
SNAP-mGluR2-TMD-3xTM4 vs. SNAP-mGluR2-TMD-I779A + MNI 137	1.1569e-06
SNAP-mGluR2-TMD-3xTM4 vs. SNAP-mGluR2-TMD-I779A + TASP	0.999201
SNAP-mGluR2-TMD-3xTM4 vs. SNAP-mGluR2-TMD-3xTM4-I779A	0.996692
SNAP-mGluR2-TMD-3xTM4 vs. SNAP-mGluR2-TMD-3xTM4-I779A + MNI 137	>0.999999999999999
SNAP-mGluR2-TMD-3xTM4 vs. SNAP-mGluR2-TMD-3xTM4-I779A + TASP	0.988437
SNAP-mGluR2-TMD-3xTM4 + MNI 137 vs. SNAP-mGluR2-TMD-3xTM4 + TASP	0.000181306
SNAP-mGluR2-TMD-3xTM4 + MNI 137 vs. SNAP-mGluR2-TMD-I779A	0.969383
SNAP-mGluR2-TMD-3xTM4 + MNI 137 vs. SNAP-mGluR2-TMD-I779A + MNI 137	3.19265e-05
SNAP-mGluR2-TMD-3xTM4 + MNI 137 vs. SNAP-mGluR2-TMD-I779A + TASP	>0.999999999999999
SNAP-mGluR2-TMD-3xTM4 + MNI 137 vs. SNAP-mGluR2-TMD-3xTM4-I779A	0.761718
SNAP-mGluR2-TMD-3xTM4 + MNI 137 vs. SNAP-mGluR2-TMD-3xTM4-I779A + MNI 137	0.99956
SNAP-mGluR2-TMD-3xTM4 + MNI 137 vs. SNAP-mGluR2-TMD-3xTM4-I779A + TASP	0.656483
SNAP-mGluR2-TMD-3xTM4 + TASP vs. SNAP-mGluR2-TMD-I779A	0.0159599
SNAP-mGluR2-TMD-3xTM4 + TASP vs. SNAP-mGluR2-TMD-I779A + MNI 137	0.999998
SNAP-mGluR2-TMD-3xTM4 + TASP vs. SNAP-mGluR2-TMD-I779A + TASP	0.000179773
SNAP-mGluR2-TMD-3xTM4 + TASP vs. SNAP-mGluR2-TMD-3xTM4-I779A	1.38794e-07
SNAP-mGluR2-TMD-3xTM4 + TASP vs. SNAP-mGluR2-TMD-3xTM4-I779A + MNI 137	8.80032e-06
SNAP-mGluR2-TMD-3xTM4 + TASP vs. SNAP-mGluR2-TMD-3xTM4-I779A + TASP	7.27417e-08
SNAP-mGluR2-TMD-I779A vs. SNAP-mGluR2-TMD-I779A + MNI 137	0.00365763
SNAP-mGluR2-TMD-I779A vs. SNAP-mGluR2-TMD-I779A + TASP	0.968994
SNAP-mGluR2-TMD-I779A vs. SNAP-mGluR2-TMD-3xTM4-I779A	0.0771754
SNAP-mGluR2-TMD-I779A vs. SNAP-mGluR2-TMD-3xTM4-I779A + MNI 137	0.584692
SNAP-mGluR2-TMD-I779A vs. SNAP-mGluR2-TMD-3xTM4-I779A + TASP	0.0504325
SNAP-mGluR2-TMD-I779A + MNI 137 vs. SNAP-mGluR2-TMD-I779A + TASP	3.16472e-05
SNAP-mGluR2-TMD-I779A + MNI 137 vs. SNAP-mGluR2-TMD-3xTM4-I779A	2.18036e-08
SNAP-mGluR2-TMD-I779A + MNI 137 vs. SNAP-mGluR2-TMD-3xTM4-I779A + MNI 137	1.43713e-06
SNAP-mGluR2-TMD-I779A + MNI 137 vs. SNAP-mGluR2-TMD-3xTM4-I779A + TASP	1.1417e-08
SNAP-mGluR2-TMD-I779A + TASP vs. SNAP-mGluR2-TMD-3xTM4-I779A	0.763118
SNAP-mGluR2-TMD-I779A + TASP vs. SNAP-mGluR2-TMD-3xTM4-I779A + MNI 137	0.999572
SNAP-mGluR2-TMD-I779A + TASP vs. SNAP-mGluR2-TMD-3xTM4-I779A + TASP	0.658058
SNAP-mGluR2-TMD-3xTM4-I779A vs. SNAP-mGluR2-TMD-3xTM4-I779A + MNI 137	0.994768
SNAP-mGluR2-TMD-3xTM4-I779A vs. SNAP-mGluR2-TMD-3xTM4-I779A + TASP	1
SNAP-mGluR2-TMD-3xTM4-I779A + MNI 137 vs. SNAP-mGluR2-TMD-3xTM4-I779A + TASP	0.983377
Part D
One-way ANOVA	7.3701e-11
Tukey-Kramer
SNAP-mGluR2-C121A vs. SNAP-mGluR2-C121A-3xTM4	3.90527e-06
SNAP-mGluR2-C121A vs. SNAP-mGluR2-C121A-I779A	6.74511e-07
SNAP-mGluR2-C121A vs. SNAP-mGluR2-C121A-3xTM4-I779A	2.6957e-11
SNAP-mGluR2-C121A-3xTM4 vs. SNAP-mGluR2-C121A-I779A	0.732859
SNAP-mGluR2-C121A-3xTM4 vs. SNAP-mGluR2-C121A-3xTM4-I779A	1.1106e-05
SNAP-mGluR2-C121A-I779A vs. SNAP-mGluR2-C121A-3xTM4-I779A	0.000209889
Part E
One-way ANOVA	0.896682
Part F
One-way ANOVA	1.37197e-31
Tukey-Kramer
SNAP-mGluR2-C121A vs. SNAP-mGluR2-C121A + MNI 137	0.999962
SNAP-mGluR2-C121A vs. SNAP-mGluR2-C121A + TASP	0.944937
SNAP-mGluR2-C121A vs. SNAP-mGluR2-C121A + Glutamate	0.789187
SNAP-mGluR2-C121A vs. SNAP-mGluR2-C121A-3xTM4	8.49817e-07
SNAP-mGluR2-C121A vs. SNAP-mGluR2-C121A-3xTM4 + MNI 137	2.28409e-06
SNAP-mGluR2-C121A vs. SNAP-mGluR2-C121A-3xTM4 +TASP	0.960217
SNAP-mGluR2-C121A vs. SNAP-mGluR2-C121A-3xTM4 + Glutamate	0.833697
SNAP-mGluR2-C121A vs. SNAP-mGluR2-C121A-I779A	3.1285e-08
SNAP-mGluR2-C121A vs. SNAP-mGluR2-C121A-I779A + MNI 137	0.0946062
SNAP-mGluR2-C121A vs. SNAP-mGluR2-C121A-I779A + TASP	2.72196e-10
SNAP-mGluR2-C121A vs. SNAP-mGluR2-C121A-I779A + Glutamate	1.45883e-10
SNAP-mGluR2-C121A vs. SNAP-mGluR2-C121A-3xTM4-I779A	1.10061e-10
SNAP-mGluR2-C121A vs. SNAP-mGluR2-C121A-3xTM4-I779A + MNI 137	1.10058e-10
SNAP-mGluR2-C121A vs. SNAP-mGluR2-C121A-3xTM4-I779A + TASP	1.1005e-10
SNAP-mGluR2-C121A vs. SNAP-mGluR2-C121A-3xTM4-I779A + Glutamate	1.10056e-10
SNAP-mGluR2-C121A + MNI 137 vs. SNAP-mGluR2-C121A + TASP	0.999988
SNAP-mGluR2-C121A + MNI 137 vs. SNAP-mGluR2-C121A + Glutamate	0.998975
SNAP-mGluR2-C121A + MNI 137 vs. SNAP-mGluR2-C121A-3xTM4	0.000176838
SNAP-mGluR2-C121A + MNI 137 vs. SNAP-mGluR2-C121A-3xTM4 + MNI 137	0.000317988
SNAP-mGluR2-C121A + MNI 137 vs. SNAP-mGluR2-C121A-3xTM4 +TASP	0.999996
SNAP-mGluR2-C121A + MNI 137 vs. SNAP-mGluR2-C121A-3xTM4 + Glutamate	0.99954
SNAP-mGluR2-C121A + MNI 137 vs. SNAP-mGluR2-C121A-I779A	7.84495e-06
SNAP-mGluR2-C121A + MNI 137 vs. SNAP-mGluR2-C121A-I779A + MNI 137	0.634712
SNAP-mGluR2-C121A + MNI 137 vs. SNAP-mGluR2-C121A-I779A + TASP	7.06093e-08
SNAP-mGluR2-C121A + MNI 137 vs. SNAP-mGluR2-C121A-I779A + Glutamate	1.78065e-08
SNAP-mGluR2-C121A + MNI 137 vs. SNAP-mGluR2-C121A-3xTM4-I779A	1.10158e-10
SNAP-mGluR2-C121A + MNI 137 vs. SNAP-mGluR2-C121A-3xTM4-I779A + MNI 137	1.1014e-10
SNAP-mGluR2-C121A + MNI 137 vs. SNAP-mGluR2-C121A-3xTM4-I779A + TASP	1.10106e-10
SNAP-mGluR2-C121A + MNI 137 vs. SNAP-mGluR2-C121A-3xTM4-I779A + Glutamate	1.1013e-10
SNAP-mGluR2-C121A + TASP vs. SNAP-mGluR2-C121A + Glutamate	1
SNAP-mGluR2-C121A + TASP vs. SNAP-mGluR2-C121A-3xTM4	0.00363219
SNAP-mGluR2-C121A + TASP vs. SNAP-mGluR2-C121A-3xTM4 + MNI 137	0.00551368
SNAP-mGluR2-C121A + TASP vs. SNAP-mGluR2-C121A-3xTM4 +TASP	>0.999999999999999
SNAP-mGluR2-C121A + TASP vs. SNAP-mGluR2-C121A-3xTM4 + Glutamate	1
SNAP-mGluR2-C121A + TASP vs. SNAP-mGluR2-C121A-I779A	0.00019005
SNAP-mGluR2-C121A + TASP vs. SNAP-mGluR2-C121A-I779A + MNI 137	0.978585
SNAP-mGluR2-C121A + TASP vs. SNAP-mGluR2-C121A-I779A + TASP	2.16391e-06
SNAP-mGluR2-C121A + TASP vs. SNAP-mGluR2-C121A-I779A + Glutamate	5.67775e-07
SNAP-mGluR2-C121A + TASP vs. SNAP-mGluR2-C121A-3xTM4-I779A	1.10262e-10
SNAP-mGluR2-C121A + TASP vs. SNAP-mGluR2-C121A-3xTM4-I779A + MNI 137	1.1023e-10
SNAP-mGluR2-C121A + TASP vs. SNAP-mGluR2-C121A-3xTM4-I779A + TASP	1.10157e-10
SNAP-mGluR2-C121A + TASP vs. SNAP-mGluR2-C121A-3xTM4-I779A + Glutamate	1.10202e-10
SNAP-mGluR2-C121A + Glutamate vs. SNAP-mGluR2-C121A-3xTM4	0.0120578
SNAP-mGluR2-C121A + Glutamate vs. SNAP-mGluR2-C121A-3xTM4 + MNI 137	0.0170147
SNAP-mGluR2-C121A + Glutamate vs. SNAP-mGluR2-C121A-3xTM4 +TASP	1
SNAP-mGluR2-C121A + Glutamate vs. SNAP-mGluR2-C121A-3xTM4 + Glutamate	>0.999999999999999
SNAP-mGluR2-C121A + Glutamate vs. SNAP-mGluR2-C121A-I779A	0.00071194
SNAP-mGluR2-C121A + Glutamate vs. SNAP-mGluR2-C121A-I779A + MNI 137	0.998416
SNAP-mGluR2-C121A + Glutamate vs. SNAP-mGluR2-C121A-I779A + TASP	9.32052e-06
SNAP-mGluR2-C121A + Glutamate vs. SNAP-mGluR2-C121A-I779A + Glutamate	2.51249e-06
SNAP-mGluR2-C121A + Glutamate vs. SNAP-mGluR2-C121A-3xTM4-I779A	1.10579e-10
SNAP-mGluR2-C121A + Glutamate vs. SNAP-mGluR2-C121A-3xTM4-I779A + MNI 137	1.10398e-10
SNAP-mGluR2-C121A + Glutamate vs. SNAP-mGluR2-C121A-3xTM4-I779A + TASP	1.10198e-10
SNAP-mGluR2-C121A + Glutamate vs. SNAP-mGluR2-C121A-3xTM4-I779A + Glutamate	1.10306e-10
SNAP-mGluR2-C121A-3xTM4 vs. SNAP-mGluR2-C121A-3xTM4 + MNI 137	>0.999999999999999
SNAP-mGluR2-C121A-3xTM4 vs. SNAP-mGluR2-C121A-3xTM4 +TASP	0.0028964
SNAP-mGluR2-C121A-3xTM4 vs. SNAP-mGluR2-C121A-3xTM4 + Glutamate	0.00934369
SNAP-mGluR2-C121A-3xTM4 vs. SNAP-mGluR2-C121A-I779A	0.999778
SNAP-mGluR2-C121A-3xTM4 vs. SNAP-mGluR2-C121A-I779A + MNI 137	0.294343
SNAP-mGluR2-C121A-3xTM4 vs. SNAP-mGluR2-C121A-I779A + TASP	0.756712
SNAP-mGluR2-C121A-3xTM4 vs. SNAP-mGluR2-C121A-I779A + Glutamate	0.535864
SNAP-mGluR2-C121A-3xTM4 vs. SNAP-mGluR2-C121A-3xTM4-I779A	5.40852e-06
SNAP-mGluR2-C121A-3xTM4 vs. SNAP-mGluR2-C121A-3xTM4-I779A + MNI 137	2.88937e-06
SNAP-mGluR2-C121A-3xTM4 vs. SNAP-mGluR2-C121A-3xTM4-I779A + TASP	2.47576e-07
SNAP-mGluR2-C121A-3xTM4 vs. SNAP-mGluR2-C121A-3xTM4-I779A + Glutamate	1.71739e-06
SNAP-mGluR2-C121A-3xTM4 + MNI 137 vs. SNAP-mGluR2-C121A-3xTM4 +TASP	0.00445581
SNAP-mGluR2-C121A-3xTM4 + MNI 137 vs. SNAP-mGluR2-C121A-3xTM4 + Glutamate	0.0133958
SNAP-mGluR2-C121A-3xTM4 + MNI 137 vs. SNAP-mGluR2-C121A-I779A	0.999915
SNAP-mGluR2-C121A-3xTM4 + MNI 137 vs. SNAP-mGluR2-C121A-I779A + MNI 137	0.331335
SNAP-mGluR2-C121A-3xTM4 + MNI 137 vs. SNAP-mGluR2-C121A-I779A + TASP	0.823486
SNAP-mGluR2-C121A-3xTM4 + MNI 137 vs. SNAP-mGluR2-C121A-I779A + Glutamate	0.626307
SNAP-mGluR2-C121A-3xTM4 + MNI 137 vs. SNAP-mGluR2-C121A-3xTM4-I779A	1.59583e-05
SNAP-mGluR2-C121A-3xTM4 + MNI 137 vs. SNAP-mGluR2-C121A-3xTM4-I779A + MNI 137	8.81696e-06
SNAP-mGluR2-C121A-3xTM4 + MNI 137 vs. SNAP-mGluR2-C121A-3xTM4-I779A + TASP	8.56163e-07
SNAP-mGluR2-C121A-3xTM4 + MNI 137 vs. SNAP-mGluR2-C121A-3xTM4-I779A + Glutamate	5.38604e-06
SNAP-mGluR2-C121A-3xTM4 +TASP vs. SNAP-mGluR2-C121A-3xTM4 + Glutamate	1
SNAP-mGluR2-C121A-3xTM4 +TASP vs. SNAP-mGluR2-C121A-I779A	0.000148805
SNAP-mGluR2-C121A-3xTM4 +TASP vs. SNAP-mGluR2-C121A-I779A + MNI 137	0.969458
SNAP-mGluR2-C121A-3xTM4 +TASP vs. SNAP-mGluR2-C121A-I779A + TASP	1.65631e-06
SNAP-mGluR2-C121A-3xTM4 +TASP vs. SNAP-mGluR2-C121A-I779A + Glutamate	4.32719e-07
SNAP-mGluR2-C121A-3xTM4 +TASP vs. SNAP-mGluR2-C121A-3xTM4-I779A	1.10255e-10
SNAP-mGluR2-C121A-3xTM4 +TASP vs. SNAP-mGluR2-C121A-3xTM4-I779A + MNI 137	1.10214e-10
SNAP-mGluR2-C121A-3xTM4 +TASP vs. SNAP-mGluR2-C121A-3xTM4-I779A + TASP	1.10152e-10
SNAP-mGluR2-C121A-3xTM4 +TASP vs. SNAP-mGluR2-C121A-3xTM4-I779A + Glutamate	1.10191e-10
SNAP-mGluR2-C121A-3xTM4 + Glutamate vs. SNAP-mGluR2-C121A-I779A	0.000535637
SNAP-mGluR2-C121A-3xTM4 + Glutamate vs. SNAP-mGluR2-C121A-I779A + MNI 137	0.996877
SNAP-mGluR2-C121A-3xTM4 + Glutamate vs. SNAP-mGluR2-C121A-I779A + TASP	6.78648e-06
SNAP-mGluR2-C121A-3xTM4 + Glutamate vs. SNAP-mGluR2-C121A-I779A + Glutamate	1.81775e-06
SNAP-mGluR2-C121A-3xTM4 + Glutamate vs. SNAP-mGluR2-C121A-3xTM4-I779A	1.10482e-10
SNAP-mGluR2-C121A-3xTM4 + Glutamate vs. SNAP-mGluR2-C121A-3xTM4-I779A + MNI 137	1.10333e-10
SNAP-mGluR2-C121A-3xTM4 + Glutamate vs. SNAP-mGluR2-C121A-3xTM4-I779A + TASP	1.10185e-10
SNAP-mGluR2-C121A-3xTM4 + Glutamate vs. SNAP-mGluR2-C121A-3xTM4-I779A + Glutamate	1.10268e-10
SNAP-mGluR2-C121A-I779A vs. SNAP-mGluR2-C121A-I779A + MNI 137	0.0369607
SNAP-mGluR2-C121A-I779A vs. SNAP-mGluR2-C121A-I779A + TASP	0.99933
SNAP-mGluR2-C121A-I779A vs. SNAP-mGluR2-C121A-I779A + Glutamate	0.990162
SNAP-mGluR2-C121A-I779A vs. SNAP-mGluR2-C121A-3xTM4-I779A	0.000608065
SNAP-mGluR2-C121A-I779A vs. SNAP-mGluR2-C121A-3xTM4-I779A + MNI 137	0.000353918
SNAP-mGluR2-C121A-I779A vs. SNAP-mGluR2-C121A-3xTM4-I779A + TASP	4.06506e-05
SNAP-mGluR2-C121A-I779A vs. SNAP-mGluR2-C121A-3xTM4-I779A + Glutamate	0.000225048
SNAP-mGluR2-C121A-I779A + MNI 137 vs. SNAP-mGluR2-C121A-I779A + TASP	0.000979608
SNAP-mGluR2-C121A-I779A + MNI 137 vs. SNAP-mGluR2-C121A-I779A + Glutamate	0.000303694
SNAP-mGluR2-C121A-I779A + MNI 137 vs. SNAP-mGluR2-C121A-3xTM4-I779A	1.94214e-10
SNAP-mGluR2-C121A-I779A + MNI 137 vs. SNAP-mGluR2-C121A-3xTM4-I779A + MNI 137	1.5405e-10
SNAP-mGluR2-C121A-I779A + MNI 137 vs. SNAP-mGluR2-C121A-3xTM4-I779A + TASP	1.13792e-10
SNAP-mGluR2-C121A-I779A + MNI 137 vs. SNAP-mGluR2-C121A-3xTM4-I779A + Glutamate	1.35872e-10
SNAP-mGluR2-C121A-I779A + TASP vs. SNAP-mGluR2-C121A-I779A + Glutamate	1
SNAP-mGluR2-C121A-I779A + TASP vs. SNAP-mGluR2-C121A-3xTM4-I779A	0.0253128
SNAP-mGluR2-C121A-I779A + TASP vs. SNAP-mGluR2-C121A-3xTM4-I779A + MNI 137	0.0163212
SNAP-mGluR2-C121A-I779A + TASP vs. SNAP-mGluR2-C121A-3xTM4-I779A + TASP	0.00261291
SNAP-mGluR2-C121A-I779A + TASP vs. SNAP-mGluR2-C121A-3xTM4-I779A + Glutamate	0.0112308
SNAP-mGluR2-C121A-I779A + Glutamate vs. SNAP-mGluR2-C121A-3xTM4-I779A	0.0617083
SNAP-mGluR2-C121A-I779A + Glutamate vs. SNAP-mGluR2-C121A-3xTM4-I779A + MNI 137	0.0414555
SNAP-mGluR2-C121A-I779A + Glutamate vs. SNAP-mGluR2-C121A-3xTM4-I779A + TASP	0.00757852
SNAP-mGluR2-C121A-I779A + Glutamate vs. SNAP-mGluR2-C121A-3xTM4-I779A + Glutamate	0.029442
SNAP-mGluR2-C121A-3xTM4-I779A vs. SNAP-mGluR2-C121A-3xTM4-I779A + MNI 137	>0.999999999999999
SNAP-mGluR2-C121A-3xTM4-I779A vs. SNAP-mGluR2-C121A-3xTM4-I779A + TASP	0.999998
SNAP-mGluR2-C121A-3xTM4-I779A vs. SNAP-mGluR2-C121A-3xTM4-I779A + Glutamate	1
SNAP-mGluR2-C121A-3xTM4-I779A + MNI 137 vs. SNAP-mGluR2-C121A-3xTM4-I779A + TASP	1
SNAP-mGluR2-C121A-3xTM4-I779A + MNI 137 vs. SNAP-mGluR2-C121A-3xTM4-I779A + Glutamate	>0.999999999999999
SNAP-mGluR2-C121A-3xTM4-I779A + TASP vs. SNAP-mGluR2-C121A-3xTM4-I779A + Glutamate	1
Part G
One-way ANOVA	1.21768e-07
Tukey-Kramer
SNAP-mGluR3-C127A vs. SNAP-mGluR3-C127A-3xTM4	2.05847e-05
SNAP-mGluR3-C127A vs. SNAP-mGluR3-C127A-I788A	0.00331328
SNAP-mGluR3-C127A-3xTM4 vs. SNAP-mGluR3-C127A-I788A	8.56038e-08
Part H
One-way ANOVA	0.795022
Part I
One-way ANOVA	1.46374e-12
Tukey-Kramer
SNAP-mGluR3-C127A vs. SNAP-mGluR3-C127A + LY34	0.999999
SNAP-mGluR3-C127A vs. SNAP-mGluR3-C127A + Glutamate	9.80788e-07
SNAP-mGluR3-C127A vs. SNAP-mGluR3-C127A-3xTM4	9.29073e-08
SNAP-mGluR3-C127A vs. SNAP-mGluR3-C127A-3xTM4 + LY34	2.0677e-05
SNAP-mGluR3-C127A vs. SNAP-mGluR3-C127A-3xTM4 + Glutamate	0.000726465
SNAP-mGluR3-C127A vs. SNAP-mGluR3-C127A-I788A	0.00152379
SNAP-mGluR3-C127A vs. SNAP-mGluR3-C127A-I788A + LY34	0.999985
SNAP-mGluR3-C127A vs. SNAP-mGluR3-C127A-I788A + Glutamate	0.00285948
SNAP-mGluR3-C127A + LY34 vs. SNAP-mGluR3-C127A + Glutamate	1.03864e-05
SNAP-mGluR3-C127A + LY34 vs. SNAP-mGluR3-C127A-3xTM4	1.15271e-06
SNAP-mGluR3-C127A + LY34 vs. SNAP-mGluR3-C127A-3xTM4 + LY34	0.000171042
SNAP-mGluR3-C127A + LY34 vs. SNAP-mGluR3-C127A-3xTM4 + Glutamate	0.00414077
SNAP-mGluR3-C127A + LY34 vs. SNAP-mGluR3-C127A-I788A	0.00170808
SNAP-mGluR3-C127A + LY34 vs. SNAP-mGluR3-C127A-I788A + LY34	0.999476
SNAP-mGluR3-C127A + LY34 vs. SNAP-mGluR3-C127A-I788A + Glutamate	0.00307123
SNAP-mGluR3-C127A + Glutamate vs. SNAP-mGluR3-C127A-3xTM4	0.999289
SNAP-mGluR3-C127A + Glutamate vs. SNAP-mGluR3-C127A-3xTM4 + LY34	0.995502
SNAP-mGluR3-C127A + Glutamate vs. SNAP-mGluR3-C127A-3xTM4 + Glutamate	0.668669
SNAP-mGluR3-C127A + Glutamate vs. SNAP-mGluR3-C127A-I788A	1.533e-12
SNAP-mGluR3-C127A + Glutamate vs. SNAP-mGluR3-C127A-I788A + LY34	1.26133e-06
SNAP-mGluR3-C127A + Glutamate vs. SNAP-mGluR3-C127A-I788A + Glutamate	4.236e-12
SNAP-mGluR3-C127A-3xTM4 vs. SNAP-mGluR3-C127A-3xTM4 + LY34	0.86809
SNAP-mGluR3-C127A-3xTM4 vs. SNAP-mGluR3-C127A-3xTM4 + Glutamate	0.279721
SNAP-mGluR3-C127A-3xTM4 vs. SNAP-mGluR3-C127A-I788A	<0.000000000000001
SNAP-mGluR3-C127A-3xTM4 vs. SNAP-mGluR3-C127A-I788A + LY34	1.39018e-07
SNAP-mGluR3-C127A-3xTM4 vs. SNAP-mGluR3-C127A-I788A + Glutamate	<0.000000000000001
SNAP-mGluR3-C127A-3xTM4 + LY34 vs. SNAP-mGluR3-C127A-3xTM4 + Glutamate	0.984453
SNAP-mGluR3-C127A-3xTM4 + LY34 vs. SNAP-mGluR3-C127A-I788A	4.4937e-11
SNAP-mGluR3-C127A-3xTM4 + LY34 vs. SNAP-mGluR3-C127A-I788A + LY34	2.18015e-05
SNAP-mGluR3-C127A-3xTM4 + LY34 vs. SNAP-mGluR3-C127A-I788A + Glutamate	8.5089e-11
SNAP-mGluR3-C127A-3xTM4 + Glutamate vs. SNAP-mGluR3-C127A-I788A	1.28421e-09
SNAP-mGluR3-C127A-3xTM4 + Glutamate vs. SNAP-mGluR3-C127A-I788A + LY34	0.000611436
SNAP-mGluR3-C127A-3xTM4 + Glutamate vs. SNAP-mGluR3-C127A-I788A + Glutamate	2.43777e-09
SNAP-mGluR3-C127A-I788A vs. SNAP-mGluR3-C127A-I788A + LY34	0.0107146
SNAP-mGluR3-C127A-I788A vs. SNAP-mGluR3-C127A-I788A + Glutamate	1
SNAP-mGluR3-C127A-I788A + LY34 vs. SNAP-mGluR3-C127A-I788A + Glutamate	0.0182643

## Sheet: Fig 6 - FS 1 Data
Figure 6 - figure supplement 1
Part A
	% Dimerization
		TASP	MNI 137		TASP	MNI 137		TASP	MNI 137		TASP	MNI 137
Experiment Day	SNAP-mGluR2-TMD	SNAP-mGluR2-TMD	SNAP-mGluR2-TMD	SNAP-mGluR2-TMD-3xTM4	SNAP-mGluR2-TMD-3xTM4	SNAP-mGluR2-TMD-3xTM4	SNAP-mGluR2-TMD-I779A	SNAP-mGluR2-TMD-I779A	SNAP-mGluR2-TMD-I779A	SNAP-mGluR2-TMD-3xTM4-I779A	SNAP-mGluR2-TMD-3xTM4-I779A	SNAP-mGluR2-TMD-3xTM4-I779A
1	74.0909	70.2395	80.566	51.1765	69.6117	39.0323	65.2475	52.3853	60.5202	46.9832	47.4468	46.8807
1	74.2105	67.7143	69.3893	35.7143	70.2326	46.7568	70.2395	61.7391	74.2105	34.7205	39.6644	52.9921
1	78.6792	72.4903	68.4	52.5	79.7959	55.625	62.3926	61.5447	73.3333	50.8696	50.2941	50.8
2	81.8919	72.5	70.292	52.7907	76.5672	64.3802	42.7197	62.4638	77.7193	42.6316	36.7532	55.6
2	82.728	70.9816	73.871	48.5366	71.761	47.9439	55.7407	33.038	88.9011	52.9032	47.5342	41.0204
2	78.888	74.0336	66.8	49.8291	76.0927	59.0141	50.6838	41.5152	81.4286	36.5116	38.7179	44.6875
Part B
	% Dimerization
		TASP	MNI 137	Glutamate		TASP	MNI 137	Glutamate		TASP	MNI 137	Glutamate		TASP	MNI 137	Glutamate
Experiment Day	SNAP-mGluR2-C121A	SNAP-mGluR2-C121A	SNAP-mGluR2-C121A	SNAP-mGluR2-C121A	SNAP-mGluR2-C121A-3xTM4	SNAP-mGluR2-C121A-3xTM4	SNAP-mGluR2-C121A-3xTM4	SNAP-mGluR2-C121A-3xTM4	SNAP-mGluR2-C121A-I779A	SNAP-mGluR2-C121A-I779A	SNAP-mGluR2-C121A-I779A	SNAP-mGluR2-C121A-I779A	SNAP-mGluR2-C121A-3xTM4-I779A	SNAP-mGluR2-C121A-3xTM4-I779A	SNAP-mGluR2-C121A-3xTM4-I779A	SNAP-mGluR2-C121A-3xTM4-I779A
1	84.6809	76.1244	71.5217	86.4467	66.6355	78.3721	70	89.2593	69.1878	59.2308	83.5065	54	39.3976	50	49.8291	44.0541
1	85.5556	87	91.3333	81.0995	80	85.6044	81.0345	88.2759	59.9387	63.4694	83.5484	69.6748	50.6061	40.3497	50.7143	34.7761
1	89.2908	99.5238	86.7742	91.3699	56.6667	87.006	62.9064	81.3386	71.25	55.8228	76.2385	69.7619	41.6129	44.8387	40.3597	55.9341
2	98.6207	87.9253	100.303	96	67.9412	85.4955	67.9221	81.9255	56.6667	58.5315	73.8095	51.0526	48.4615	41.462	45.6701	49.1304
2	88.7952	80.1235	93.6269	70.303	64.2857	86.0289	62.8477	82.7007	67.4566	66.9231	83.5673	59.6629	50	44.902	37.5248	47.1429
2	100.976	78.9952	83.8776	76.6667	76.7133	88.5915	68.4615	80.0901	67.9221	63.8462	74.6561	56.6667	51.9355	44.878	54.7059	45.1181
Part C
	% Dimerization
		LY 341495	Glutamate		LY 341495	Glutamate		LY 341495	Glutamate
Experiment Day	SNAP-mGluR3-C127A	SNAP-mGluR3-C127A	SNAP-mGluR3-C127A	SNAP-mGluR3-C127A-3xTM4	SNAP-mGluR3-C127A-3xTM4	SNAP-mGluR3-C127A-3xTM4	SNAP-mGluR3-C127A-I788A	SNAP-mGluR3-C127A-I788A	SNAP-mGluR3-C127A-I788A
1	59.1729	50.2564	71.6327	79.2019	66.4398	70.851	31.7722	52.2222	37.9263
1	57.4157	46.8182	83.233	65.8621	68.5714	75.7142	34.4444	51.9718	41.4851
1	54.4628	44.2858	72.8572	67.9874	74.2106	66.4332	36	50.4317	28.7755
2	49.375	54.9214	68.2609	75.9259	71.3794	55.3062	38.2412	50	34.6429
2	38.9209	60.7866	70.7018	87.1014	62.043	68.0646	44.0541	47.1429	33.2749
2	54.1975	50.7318	67.6666	71.7391	74.2105	59.3548	29.3162	43.125	41.7241

## Sheet: Fig 6 - FS 1 Statistics
Figure 6 - figure supplement 1
Part A	p value
One-way ANOVA	4.3909e-16
Tukey-Kramer
SNAP-mGluR2-TMD vs. SNAP-mGluR2-TMD + MNI 137	0.896886
SNAP-mGluR2-TMD vs. SNAP-mGluR2-TMD + TASP	0.875143
SNAP-mGluR2-TMD vs. SNAP-mGluR2-TMD-3xTM4	1.28747e-07
SNAP-mGluR2-TMD vs. SNAP-mGluR2-TMD-3xTM4 + MNI 137	3.77134e-06
SNAP-mGluR2-TMD vs. SNAP-mGluR2-TMD-3xTM4 + TASP	0.996113
SNAP-mGluR2-TMD vs. SNAP-mGluR2-TMD-I779A	0.000541623
SNAP-mGluR2-TMD vs. SNAP-mGluR2-TMD-I779A + MNI 137	0.999988
SNAP-mGluR2-TMD vs. SNAP-mGluR2-TMD-I779A + TASP	3.73747e-06
SNAP-mGluR2-TMD vs. SNAP-mGluR2-TMD-3xTM4-I779A	2.40541e-09
SNAP-mGluR2-TMD vs. SNAP-mGluR2-TMD-3xTM4-I779A + MNI 137	1.60308e-07
SNAP-mGluR2-TMD vs. SNAP-mGluR2-TMD-3xTM4-I779A + TASP	1.26986e-09
SNAP-mGluR2-TMD + MNI 137 vs. SNAP-mGluR2-TMD + TASP	>0.999999999999999
SNAP-mGluR2-TMD + MNI 137 vs. SNAP-mGluR2-TMD-3xTM4	6.22891e-05
SNAP-mGluR2-TMD + MNI 137 vs. SNAP-mGluR2-TMD-3xTM4 + MNI 137	0.0013784
SNAP-mGluR2-TMD + MNI 137 vs. SNAP-mGluR2-TMD-3xTM4 + TASP	0.999985
SNAP-mGluR2-TMD + MNI 137 vs. SNAP-mGluR2-TMD-I779A	0.0780118
SNAP-mGluR2-TMD + MNI 137 vs. SNAP-mGluR2-TMD-I779A + MNI 137	0.995637
SNAP-mGluR2-TMD + MNI 137 vs. SNAP-mGluR2-TMD-I779A + TASP	0.00136743
SNAP-mGluR2-TMD + MNI 137 vs. SNAP-mGluR2-TMD-3xTM4-I779A	1.31615e-06
SNAP-mGluR2-TMD + MNI 137 vs. SNAP-mGluR2-TMD-3xTM4-I779A + MNI 137	7.65845e-05
SNAP-mGluR2-TMD + MNI 137 vs. SNAP-mGluR2-TMD-3xTM4-I779A + TASP	6.94118e-07
SNAP-mGluR2-TMD + TASP vs. SNAP-mGluR2-TMD-3xTM4	7.59247e-05
SNAP-mGluR2-TMD + TASP vs. SNAP-mGluR2-TMD-3xTM4 + MNI 137	0.0016532
SNAP-mGluR2-TMD + TASP vs. SNAP-mGluR2-TMD-3xTM4 + TASP	0.999963
SNAP-mGluR2-TMD + TASP vs. SNAP-mGluR2-TMD-I779A	0.0890859
SNAP-mGluR2-TMD + TASP vs. SNAP-mGluR2-TMD-I779A + MNI 137	0.993363
SNAP-mGluR2-TMD + TASP vs. SNAP-mGluR2-TMD-I779A + TASP	0.00164013
SNAP-mGluR2-TMD + TASP vs. SNAP-mGluR2-TMD-3xTM4-I779A	1.61984e-06
SNAP-mGluR2-TMD + TASP vs. SNAP-mGluR2-TMD-3xTM4-I779A + MNI 137	9.3276e-05
SNAP-mGluR2-TMD + TASP vs. SNAP-mGluR2-TMD-3xTM4-I779A + TASP	8.55028e-07
SNAP-mGluR2-TMD-3xTM4 vs. SNAP-mGluR2-TMD-3xTM4 + MNI 137	0.99918
SNAP-mGluR2-TMD-3xTM4 vs. SNAP-mGluR2-TMD-3xTM4 + TASP	7.10946e-06
SNAP-mGluR2-TMD-3xTM4 vs. SNAP-mGluR2-TMD-I779A	0.546149
SNAP-mGluR2-TMD-3xTM4 vs. SNAP-mGluR2-TMD-I779A + MNI 137	1.1569e-06
SNAP-mGluR2-TMD-3xTM4 vs. SNAP-mGluR2-TMD-I779A + TASP	0.999201
SNAP-mGluR2-TMD-3xTM4 vs. SNAP-mGluR2-TMD-3xTM4-I779A	0.996692
SNAP-mGluR2-TMD-3xTM4 vs. SNAP-mGluR2-TMD-3xTM4-I779A + MNI 137	>0.999999999999999
SNAP-mGluR2-TMD-3xTM4 vs. SNAP-mGluR2-TMD-3xTM4-I779A + TASP	0.988437
SNAP-mGluR2-TMD-3xTM4 + MNI 137 vs. SNAP-mGluR2-TMD-3xTM4 + TASP	0.000181306
SNAP-mGluR2-TMD-3xTM4 + MNI 137 vs. SNAP-mGluR2-TMD-I779A	0.969383
SNAP-mGluR2-TMD-3xTM4 + MNI 137 vs. SNAP-mGluR2-TMD-I779A + MNI 137	3.19265e-05
SNAP-mGluR2-TMD-3xTM4 + MNI 137 vs. SNAP-mGluR2-TMD-I779A + TASP	>0.999999999999999
SNAP-mGluR2-TMD-3xTM4 + MNI 137 vs. SNAP-mGluR2-TMD-3xTM4-I779A	0.761718
SNAP-mGluR2-TMD-3xTM4 + MNI 137 vs. SNAP-mGluR2-TMD-3xTM4-I779A + MNI 137	0.99956
SNAP-mGluR2-TMD-3xTM4 + MNI 137 vs. SNAP-mGluR2-TMD-3xTM4-I779A + TASP	0.656483
SNAP-mGluR2-TMD-3xTM4 + TASP vs. SNAP-mGluR2-TMD-I779A	0.0159599
SNAP-mGluR2-TMD-3xTM4 + TASP vs. SNAP-mGluR2-TMD-I779A + MNI 137	0.999998
SNAP-mGluR2-TMD-3xTM4 + TASP vs. SNAP-mGluR2-TMD-I779A + TASP	0.000179773
SNAP-mGluR2-TMD-3xTM4 + TASP vs. SNAP-mGluR2-TMD-3xTM4-I779A	1.38794e-07
SNAP-mGluR2-TMD-3xTM4 + TASP vs. SNAP-mGluR2-TMD-3xTM4-I779A + MNI 137	8.80032e-06
SNAP-mGluR2-TMD-3xTM4 + TASP vs. SNAP-mGluR2-TMD-3xTM4-I779A + TASP	7.27417e-08
SNAP-mGluR2-TMD-I779A vs. SNAP-mGluR2-TMD-I779A + MNI 137	0.00365763
SNAP-mGluR2-TMD-I779A vs. SNAP-mGluR2-TMD-I779A + TASP	0.968994
SNAP-mGluR2-TMD-I779A vs. SNAP-mGluR2-TMD-3xTM4-I779A	0.0771754
SNAP-mGluR2-TMD-I779A vs. SNAP-mGluR2-TMD-3xTM4-I779A + MNI 137	0.584692
SNAP-mGluR2-TMD-I779A vs. SNAP-mGluR2-TMD-3xTM4-I779A + TASP	0.0504325
SNAP-mGluR2-TMD-I779A + MNI 137 vs. SNAP-mGluR2-TMD-I779A + TASP	3.16472e-05
SNAP-mGluR2-TMD-I779A + MNI 137 vs. SNAP-mGluR2-TMD-3xTM4-I779A	2.18036e-08
SNAP-mGluR2-TMD-I779A + MNI 137 vs. SNAP-mGluR2-TMD-3xTM4-I779A + MNI 137	1.43713e-06
SNAP-mGluR2-TMD-I779A + MNI 137 vs. SNAP-mGluR2-TMD-3xTM4-I779A + TASP	1.1417e-08
SNAP-mGluR2-TMD-I779A + TASP vs. SNAP-mGluR2-TMD-3xTM4-I779A	0.763118
SNAP-mGluR2-TMD-I779A + TASP vs. SNAP-mGluR2-TMD-3xTM4-I779A + MNI 137	0.999572
SNAP-mGluR2-TMD-I779A + TASP vs. SNAP-mGluR2-TMD-3xTM4-I779A + TASP	0.658058
SNAP-mGluR2-TMD-3xTM4-I779A vs. SNAP-mGluR2-TMD-3xTM4-I779A + MNI 137	0.994768
SNAP-mGluR2-TMD-3xTM4-I779A vs. SNAP-mGluR2-TMD-3xTM4-I779A + TASP	1
SNAP-mGluR2-TMD-3xTM4-I779A + MNI 137 vs. SNAP-mGluR2-TMD-3xTM4-I779A + TASP	0.983377
Part B
One-way ANOVA	1.37197e-31
Tukey-Kramer
SNAP-mGluR2-C121A vs. SNAP-mGluR2-C121A + MNI 137	0.999962
SNAP-mGluR2-C121A vs. SNAP-mGluR2-C121A + TASP	0.944937
SNAP-mGluR2-C121A vs. SNAP-mGluR2-C121A + Glutamate	0.789187
SNAP-mGluR2-C121A vs. SNAP-mGluR2-C121A-3xTM4	8.49817e-07
SNAP-mGluR2-C121A vs. SNAP-mGluR2-C121A-3xTM4 + MNI 137	2.28409e-06
SNAP-mGluR2-C121A vs. SNAP-mGluR2-C121A-3xTM4 +TASP	0.960217
SNAP-mGluR2-C121A vs. SNAP-mGluR2-C121A-3xTM4 + Glutamate	0.833697
SNAP-mGluR2-C121A vs. SNAP-mGluR2-C121A-I779A	3.1285e-08
SNAP-mGluR2-C121A vs. SNAP-mGluR2-C121A-I779A + MNI 137	0.0946062
SNAP-mGluR2-C121A vs. SNAP-mGluR2-C121A-I779A + TASP	2.72196e-10
SNAP-mGluR2-C121A vs. SNAP-mGluR2-C121A-I779A + Glutamate	1.45883e-10
SNAP-mGluR2-C121A vs. SNAP-mGluR2-C121A-3xTM4-I779A	1.10061e-10
SNAP-mGluR2-C121A vs. SNAP-mGluR2-C121A-3xTM4-I779A + MNI 137	1.10058e-10
SNAP-mGluR2-C121A vs. SNAP-mGluR2-C121A-3xTM4-I779A + TASP	1.1005e-10
SNAP-mGluR2-C121A vs. SNAP-mGluR2-C121A-3xTM4-I779A + Glutamate	1.10056e-10
SNAP-mGluR2-C121A + MNI 137 vs. SNAP-mGluR2-C121A + TASP	0.999988
SNAP-mGluR2-C121A + MNI 137 vs. SNAP-mGluR2-C121A + Glutamate	0.998975
SNAP-mGluR2-C121A + MNI 137 vs. SNAP-mGluR2-C121A-3xTM4	0.000176838
SNAP-mGluR2-C121A + MNI 137 vs. SNAP-mGluR2-C121A-3xTM4 + MNI 137	0.000317988
SNAP-mGluR2-C121A + MNI 137 vs. SNAP-mGluR2-C121A-3xTM4 +TASP	0.999996
SNAP-mGluR2-C121A + MNI 137 vs. SNAP-mGluR2-C121A-3xTM4 + Glutamate	0.99954
SNAP-mGluR2-C121A + MNI 137 vs. SNAP-mGluR2-C121A-I779A	7.84495e-06
SNAP-mGluR2-C121A + MNI 137 vs. SNAP-mGluR2-C121A-I779A + MNI 137	0.634712
SNAP-mGluR2-C121A + MNI 137 vs. SNAP-mGluR2-C121A-I779A + TASP	7.06093e-08
SNAP-mGluR2-C121A + MNI 137 vs. SNAP-mGluR2-C121A-I779A + Glutamate	1.78065e-08
SNAP-mGluR2-C121A + MNI 137 vs. SNAP-mGluR2-C121A-3xTM4-I779A	1.10158e-10
SNAP-mGluR2-C121A + MNI 137 vs. SNAP-mGluR2-C121A-3xTM4-I779A + MNI 137	1.1014e-10
SNAP-mGluR2-C121A + MNI 137 vs. SNAP-mGluR2-C121A-3xTM4-I779A + TASP	1.10106e-10
SNAP-mGluR2-C121A + MNI 137 vs. SNAP-mGluR2-C121A-3xTM4-I779A + Glutamate	1.1013e-10
SNAP-mGluR2-C121A + TASP vs. SNAP-mGluR2-C121A + Glutamate	1
SNAP-mGluR2-C121A + TASP vs. SNAP-mGluR2-C121A-3xTM4	0.00363219
SNAP-mGluR2-C121A + TASP vs. SNAP-mGluR2-C121A-3xTM4 + MNI 137	0.00551368
SNAP-mGluR2-C121A + TASP vs. SNAP-mGluR2-C121A-3xTM4 +TASP	>0.999999999999999
SNAP-mGluR2-C121A + TASP vs. SNAP-mGluR2-C121A-3xTM4 + Glutamate	1
SNAP-mGluR2-C121A + TASP vs. SNAP-mGluR2-C121A-I779A	0.00019005
SNAP-mGluR2-C121A + TASP vs. SNAP-mGluR2-C121A-I779A + MNI 137	0.978585
SNAP-mGluR2-C121A + TASP vs. SNAP-mGluR2-C121A-I779A + TASP	2.16391e-06
SNAP-mGluR2-C121A + TASP vs. SNAP-mGluR2-C121A-I779A + Glutamate	5.67775e-07
SNAP-mGluR2-C121A + TASP vs. SNAP-mGluR2-C121A-3xTM4-I779A	1.10262e-10
SNAP-mGluR2-C121A + TASP vs. SNAP-mGluR2-C121A-3xTM4-I779A + MNI 137	1.1023e-10
SNAP-mGluR2-C121A + TASP vs. SNAP-mGluR2-C121A-3xTM4-I779A + TASP	1.10157e-10
SNAP-mGluR2-C121A + TASP vs. SNAP-mGluR2-C121A-3xTM4-I779A + Glutamate	1.10202e-10
SNAP-mGluR2-C121A + Glutamate vs. SNAP-mGluR2-C121A-3xTM4	0.0120578
SNAP-mGluR2-C121A + Glutamate vs. SNAP-mGluR2-C121A-3xTM4 + MNI 137	0.0170147
SNAP-mGluR2-C121A + Glutamate vs. SNAP-mGluR2-C121A-3xTM4 +TASP	1
SNAP-mGluR2-C121A + Glutamate vs. SNAP-mGluR2-C121A-3xTM4 + Glutamate	>0.999999999999999
SNAP-mGluR2-C121A + Glutamate vs. SNAP-mGluR2-C121A-I779A	0.00071194
SNAP-mGluR2-C121A + Glutamate vs. SNAP-mGluR2-C121A-I779A + MNI 137	0.998416
SNAP-mGluR2-C121A + Glutamate vs. SNAP-mGluR2-C121A-I779A + TASP	9.32052e-06
SNAP-mGluR2-C121A + Glutamate vs. SNAP-mGluR2-C121A-I779A + Glutamate	2.51249e-06
SNAP-mGluR2-C121A + Glutamate vs. SNAP-mGluR2-C121A-3xTM4-I779A	1.10579e-10
SNAP-mGluR2-C121A + Glutamate vs. SNAP-mGluR2-C121A-3xTM4-I779A + MNI 137	1.10398e-10
SNAP-mGluR2-C121A + Glutamate vs. SNAP-mGluR2-C121A-3xTM4-I779A + TASP	1.10198e-10
SNAP-mGluR2-C121A + Glutamate vs. SNAP-mGluR2-C121A-3xTM4-I779A + Glutamate	1.10306e-10
SNAP-mGluR2-C121A-3xTM4 vs. SNAP-mGluR2-C121A-3xTM4 + MNI 137	>0.999999999999999
SNAP-mGluR2-C121A-3xTM4 vs. SNAP-mGluR2-C121A-3xTM4 +TASP	0.0028964
SNAP-mGluR2-C121A-3xTM4 vs. SNAP-mGluR2-C121A-3xTM4 + Glutamate	0.00934369
SNAP-mGluR2-C121A-3xTM4 vs. SNAP-mGluR2-C121A-I779A	0.999778
SNAP-mGluR2-C121A-3xTM4 vs. SNAP-mGluR2-C121A-I779A + MNI 137	0.294343
SNAP-mGluR2-C121A-3xTM4 vs. SNAP-mGluR2-C121A-I779A + TASP	0.756712
SNAP-mGluR2-C121A-3xTM4 vs. SNAP-mGluR2-C121A-I779A + Glutamate	0.535864
SNAP-mGluR2-C121A-3xTM4 vs. SNAP-mGluR2-C121A-3xTM4-I779A	5.40852e-06
SNAP-mGluR2-C121A-3xTM4 vs. SNAP-mGluR2-C121A-3xTM4-I779A + MNI 137	2.88937e-06
SNAP-mGluR2-C121A-3xTM4 vs. SNAP-mGluR2-C121A-3xTM4-I779A + TASP	2.47576e-07
SNAP-mGluR2-C121A-3xTM4 vs. SNAP-mGluR2-C121A-3xTM4-I779A + Glutamate	1.71739e-06
SNAP-mGluR2-C121A-3xTM4 + MNI 137 vs. SNAP-mGluR2-C121A-3xTM4 +TASP	0.00445581
SNAP-mGluR2-C121A-3xTM4 + MNI 137 vs. SNAP-mGluR2-C121A-3xTM4 + Glutamate	0.0133958
SNAP-mGluR2-C121A-3xTM4 + MNI 137 vs. SNAP-mGluR2-C121A-I779A	0.999915
SNAP-mGluR2-C121A-3xTM4 + MNI 137 vs. SNAP-mGluR2-C121A-I779A + MNI 137	0.331335
SNAP-mGluR2-C121A-3xTM4 + MNI 137 vs. SNAP-mGluR2-C121A-I779A + TASP	0.823486
SNAP-mGluR2-C121A-3xTM4 + MNI 137 vs. SNAP-mGluR2-C121A-I779A + Glutamate	0.626307
SNAP-mGluR2-C121A-3xTM4 + MNI 137 vs. SNAP-mGluR2-C121A-3xTM4-I779A	1.59583e-05
SNAP-mGluR2-C121A-3xTM4 + MNI 137 vs. SNAP-mGluR2-C121A-3xTM4-I779A + MNI 137	8.81696e-06
SNAP-mGluR2-C121A-3xTM4 + MNI 137 vs. SNAP-mGluR2-C121A-3xTM4-I779A + TASP	8.56163e-07
SNAP-mGluR2-C121A-3xTM4 + MNI 137 vs. SNAP-mGluR2-C121A-3xTM4-I779A + Glutamate	5.38604e-06
SNAP-mGluR2-C121A-3xTM4 +TASP vs. SNAP-mGluR2-C121A-3xTM4 + Glutamate	1
SNAP-mGluR2-C121A-3xTM4 +TASP vs. SNAP-mGluR2-C121A-I779A	0.000148805
SNAP-mGluR2-C121A-3xTM4 +TASP vs. SNAP-mGluR2-C121A-I779A + MNI 137	0.969458
SNAP-mGluR2-C121A-3xTM4 +TASP vs. SNAP-mGluR2-C121A-I779A + TASP	1.65631e-06
SNAP-mGluR2-C121A-3xTM4 +TASP vs. SNAP-mGluR2-C121A-I779A + Glutamate	4.32719e-07
SNAP-mGluR2-C121A-3xTM4 +TASP vs. SNAP-mGluR2-C121A-3xTM4-I779A	1.10255e-10
SNAP-mGluR2-C121A-3xTM4 +TASP vs. SNAP-mGluR2-C121A-3xTM4-I779A + MNI 137	1.10214e-10
SNAP-mGluR2-C121A-3xTM4 +TASP vs. SNAP-mGluR2-C121A-3xTM4-I779A + TASP	1.10152e-10
SNAP-mGluR2-C121A-3xTM4 +TASP vs. SNAP-mGluR2-C121A-3xTM4-I779A + Glutamate	1.10191e-10
SNAP-mGluR2-C121A-3xTM4 + Glutamate vs. SNAP-mGluR2-C121A-I779A	0.000535637
SNAP-mGluR2-C121A-3xTM4 + Glutamate vs. SNAP-mGluR2-C121A-I779A + MNI 137	0.996877
SNAP-mGluR2-C121A-3xTM4 + Glutamate vs. SNAP-mGluR2-C121A-I779A + TASP	6.78648e-06
SNAP-mGluR2-C121A-3xTM4 + Glutamate vs. SNAP-mGluR2-C121A-I779A + Glutamate	1.81775e-06
SNAP-mGluR2-C121A-3xTM4 + Glutamate vs. SNAP-mGluR2-C121A-3xTM4-I779A	1.10482e-10
SNAP-mGluR2-C121A-3xTM4 + Glutamate vs. SNAP-mGluR2-C121A-3xTM4-I779A + MNI 137	1.10333e-10
SNAP-mGluR2-C121A-3xTM4 + Glutamate vs. SNAP-mGluR2-C121A-3xTM4-I779A + TASP	1.10185e-10
SNAP-mGluR2-C121A-3xTM4 + Glutamate vs. SNAP-mGluR2-C121A-3xTM4-I779A + Glutamate	1.10268e-10
SNAP-mGluR2-C121A-I779A vs. SNAP-mGluR2-C121A-I779A + MNI 137	0.0369607
SNAP-mGluR2-C121A-I779A vs. SNAP-mGluR2-C121A-I779A + TASP	0.99933
SNAP-mGluR2-C121A-I779A vs. SNAP-mGluR2-C121A-I779A + Glutamate	0.990162
SNAP-mGluR2-C121A-I779A vs. SNAP-mGluR2-C121A-3xTM4-I779A	0.000608065
SNAP-mGluR2-C121A-I779A vs. SNAP-mGluR2-C121A-3xTM4-I779A + MNI 137	0.000353918
SNAP-mGluR2-C121A-I779A vs. SNAP-mGluR2-C121A-3xTM4-I779A + TASP	4.06506e-05
SNAP-mGluR2-C121A-I779A vs. SNAP-mGluR2-C121A-3xTM4-I779A + Glutamate	0.000225048
SNAP-mGluR2-C121A-I779A + MNI 137 vs. SNAP-mGluR2-C121A-I779A + TASP	0.000979608
SNAP-mGluR2-C121A-I779A + MNI 137 vs. SNAP-mGluR2-C121A-I779A + Glutamate	0.000303694
SNAP-mGluR2-C121A-I779A + MNI 137 vs. SNAP-mGluR2-C121A-3xTM4-I779A	1.94214e-10
SNAP-mGluR2-C121A-I779A + MNI 137 vs. SNAP-mGluR2-C121A-3xTM4-I779A + MNI 137	1.5405e-10
SNAP-mGluR2-C121A-I779A + MNI 137 vs. SNAP-mGluR2-C121A-3xTM4-I779A + TASP	1.13792e-10
SNAP-mGluR2-C121A-I779A + MNI 137 vs. SNAP-mGluR2-C121A-3xTM4-I779A + Glutamate	1.35872e-10
SNAP-mGluR2-C121A-I779A + TASP vs. SNAP-mGluR2-C121A-I779A + Glutamate	1
SNAP-mGluR2-C121A-I779A + TASP vs. SNAP-mGluR2-C121A-3xTM4-I779A	0.0253128
SNAP-mGluR2-C121A-I779A + TASP vs. SNAP-mGluR2-C121A-3xTM4-I779A + MNI 137	0.0163212
SNAP-mGluR2-C121A-I779A + TASP vs. SNAP-mGluR2-C121A-3xTM4-I779A + TASP	0.00261291
SNAP-mGluR2-C121A-I779A + TASP vs. SNAP-mGluR2-C121A-3xTM4-I779A + Glutamate	0.0112308
SNAP-mGluR2-C121A-I779A + Glutamate vs. SNAP-mGluR2-C121A-3xTM4-I779A	0.0617083
SNAP-mGluR2-C121A-I779A + Glutamate vs. SNAP-mGluR2-C121A-3xTM4-I779A + MNI 137	0.0414555
SNAP-mGluR2-C121A-I779A + Glutamate vs. SNAP-mGluR2-C121A-3xTM4-I779A + TASP	0.00757852
SNAP-mGluR2-C121A-I779A + Glutamate vs. SNAP-mGluR2-C121A-3xTM4-I779A + Glutamate	0.029442
SNAP-mGluR2-C121A-3xTM4-I779A vs. SNAP-mGluR2-C121A-3xTM4-I779A + MNI 137	>0.999999999999999
SNAP-mGluR2-C121A-3xTM4-I779A vs. SNAP-mGluR2-C121A-3xTM4-I779A + TASP	0.999998
SNAP-mGluR2-C121A-3xTM4-I779A vs. SNAP-mGluR2-C121A-3xTM4-I779A + Glutamate	1
SNAP-mGluR2-C121A-3xTM4-I779A + MNI 137 vs. SNAP-mGluR2-C121A-3xTM4-I779A + TASP	1
SNAP-mGluR2-C121A-3xTM4-I779A + MNI 137 vs. SNAP-mGluR2-C121A-3xTM4-I779A + Glutamate	>0.999999999999999
SNAP-mGluR2-C121A-3xTM4-I779A + TASP vs. SNAP-mGluR2-C121A-3xTM4-I779A + Glutamate	1
Part C
One-way ANOVA	1.46374e-12
Tukey-Kramer
SNAP-mGluR3-C127A vs. SNAP-mGluR3-C127A + LY34	0.999999
SNAP-mGluR3-C127A vs. SNAP-mGluR3-C127A + Glutamate	9.80788e-07
SNAP-mGluR3-C127A vs. SNAP-mGluR3-C127A-3xTM4	9.29073e-08
SNAP-mGluR3-C127A vs. SNAP-mGluR3-C127A-3xTM4 + LY34	2.0677e-05
SNAP-mGluR3-C127A vs. SNAP-mGluR3-C127A-3xTM4 + Glutamate	0.000726465
SNAP-mGluR3-C127A vs. SNAP-mGluR3-C127A-I788A	0.00152379
SNAP-mGluR3-C127A vs. SNAP-mGluR3-C127A-I788A + LY34	0.999985
SNAP-mGluR3-C127A vs. SNAP-mGluR3-C127A-I788A + Glutamate	0.00285948
SNAP-mGluR3-C127A + LY34 vs. SNAP-mGluR3-C127A + Glutamate	1.03864e-05
SNAP-mGluR3-C127A + LY34 vs. SNAP-mGluR3-C127A-3xTM4	1.15271e-06
SNAP-mGluR3-C127A + LY34 vs. SNAP-mGluR3-C127A-3xTM4 + LY34	0.000171042
SNAP-mGluR3-C127A + LY34 vs. SNAP-mGluR3-C127A-3xTM4 + Glutamate	0.00414077
SNAP-mGluR3-C127A + LY34 vs. SNAP-mGluR3-C127A-I788A	0.00170808
SNAP-mGluR3-C127A + LY34 vs. SNAP-mGluR3-C127A-I788A + LY34	0.999476
SNAP-mGluR3-C127A + LY34 vs. SNAP-mGluR3-C127A-I788A + Glutamate	0.00307123
SNAP-mGluR3-C127A + Glutamate vs. SNAP-mGluR3-C127A-3xTM4	0.999289
SNAP-mGluR3-C127A + Glutamate vs. SNAP-mGluR3-C127A-3xTM4 + LY34	0.995502
SNAP-mGluR3-C127A + Glutamate vs. SNAP-mGluR3-C127A-3xTM4 + Glutamate	0.668669
SNAP-mGluR3-C127A + Glutamate vs. SNAP-mGluR3-C127A-I788A	1.533e-12
SNAP-mGluR3-C127A + Glutamate vs. SNAP-mGluR3-C127A-I788A + LY34	1.26133e-06
SNAP-mGluR3-C127A + Glutamate vs. SNAP-mGluR3-C127A-I788A + Glutamate	4.236e-12
SNAP-mGluR3-C127A-3xTM4 vs. SNAP-mGluR3-C127A-3xTM4 + LY34	0.86809
SNAP-mGluR3-C127A-3xTM4 vs. SNAP-mGluR3-C127A-3xTM4 + Glutamate	0.279721
SNAP-mGluR3-C127A-3xTM4 vs. SNAP-mGluR3-C127A-I788A	<0.000000000000001
SNAP-mGluR3-C127A-3xTM4 vs. SNAP-mGluR3-C127A-I788A + LY34	1.39018e-07
SNAP-mGluR3-C127A-3xTM4 vs. SNAP-mGluR3-C127A-I788A + Glutamate	<0.000000000000001
SNAP-mGluR3-C127A-3xTM4 + LY34 vs. SNAP-mGluR3-C127A-3xTM4 + Glutamate	0.984453
SNAP-mGluR3-C127A-3xTM4 + LY34 vs. SNAP-mGluR3-C127A-I788A	4.4937e-11
SNAP-mGluR3-C127A-3xTM4 + LY34 vs. SNAP-mGluR3-C127A-I788A + LY34	2.18015e-05
SNAP-mGluR3-C127A-3xTM4 + LY34 vs. SNAP-mGluR3-C127A-I788A + Glutamate	8.5089e-11
SNAP-mGluR3-C127A-3xTM4 + Glutamate vs. SNAP-mGluR3-C127A-I788A	1.28421e-09
SNAP-mGluR3-C127A-3xTM4 + Glutamate vs. SNAP-mGluR3-C127A-I788A + LY34	0.000611436
SNAP-mGluR3-C127A-3xTM4 + Glutamate vs. SNAP-mGluR3-C127A-I788A + Glutamate	2.43777e-09
SNAP-mGluR3-C127A-I788A vs. SNAP-mGluR3-C127A-I788A + LY34	0.0107146
SNAP-mGluR3-C127A-I788A vs. SNAP-mGluR3-C127A-I788A + Glutamate	1
SNAP-mGluR3-C127A-I788A + LY34 vs. SNAP-mGluR3-C127A-I788A + Glutamate	0.0182643
