# Supplementary material for: Differences in interactions between transmembrane domains tune the activation of metabotropic glutamate receptors
Source: eLife. 2021 Apr 21;10:e67027. doi: 10.7554/eLife.67027 (PMC8102066; doi:10.7554/eLife.67027)
Supplement: Figure 7—source data 1. [file elife-67027-fig7-data1.xlsx]

## Sheet: Fig 7 Data
Figure 7
Part B	Pulldown (norm.)
Experiment Day	SNAP-mGluR2-TMD/CLIP-mGluR2-TMD	SNAP-mGluR2-TMD/CLIP-mGluR3-TMD
1	0.722031	0.319845
1	1.43029	0.466577
1	1.05405	0.38452
1	0.984587	0.590175
1	0.730449	0.704261
1	1.07859	0.540932
2	0.945298	0.57465
2	1.1398	0.527529
2	1.07408	0.289631
2	0.875829	0.653782
2	0.964992	0.680758
Part C	CLIP/SNAP Fluorescence intensity ratio
Experiment Day	SNAP-mGluR2-TMD/CLIP-mGluR2-TMD	SNAP-mGluR2-TMD/CLIP-mGluR3-TMD
1	1.26662	0.917048
1	1.04737	1.03912
1	0.937919	1.05901
1	0.826121	1.27117
1	1.01576	0.708496
1	0.950258	1.00767
1	0.881048	0.8129
2	1.01368	1.29674
2	1.14323	1.12484
2	0.824312	1.44171
2	0.76417	1.36604
2	1.40087	1.17029
2		1.5597
2		1.62471
Part E	Pulldown (norm.)
Experiment Day	SNAP-mGluR3-TMD/CLIP-mGluR3-TMD	SNAP-mGluR3-TMD/CLIP-mGluR2-TMD
1	0.988068	1.10497
1	0.986495	1.28535
1	1.15017	1.20267
1	0.957845	1.34637
1	0.87863	0.932022
1	1.03879	1.4044
2	1.17864	1.35775
2	1.04871	1.14698
2	1.25805	1.18446
2	0.932106	1.05729
2	0.817274	1.07947
Part F	CLIP/SNAP Fluorescence intensity ratio
Experiment Day	SNAP-mGluR3-TMD/CLIP-mGluR3-TMD	SNAP-mGluR3-TMD/CLIP-mGluR2-TMD
1	1.14494	1.19554
1	1.19174	1.06374
1	0.955867	1.06984
1	0.987415	0.439312
1	0.832227	1.02343
1	0.923114	1.05192
2	0.907563	0.855614
2	0.972286	1.65821
2	1.7088	1.65094
2	0.918709	1.07206
2	0.952531	0.85624
2	0.838256	0.691673
2	1.05299
Part H	Pulldown (norm.)
Experiment Day	SNAP-mGluR2/CLIP-mGluR2	SNAP-mGluR2/CLIP-mGluR3	C121A/C121A	C121A/C127A	C121A/C127A-3xTM4
1	1.24055		0.816083	0.236895	0.581464
1	1.03079		0.866635	0.23816	0.570786
1	0.94996		0.915527	0.241457	0.54293
1	0.97636		0.913119	0.473822	0.49708
1	0.80234		0.868643	0.451761	0.519897
2	1.0928		1.52726	0.321581	0.753652
2	0.88148		1.18319	0.264221	0.859352
2	1.13177		1.34808	0.237005	0.868078
2	0.89395		1.17234	0.185978	0.953112
3	1.13693	2.35275
3	0.928344	2.30395
3	0.980375	2.52693
3	0.954348	2.45409
4	0.92199	1.86797
4	1.36294	1.5816
4	0.899559	2.28132
4	0.81551	1.68363
5	1.10086		1.0342	0.102019
5	0.896158		0.898719	0.14134
5	0.927795		0.789057	0.113725
5	0.880471		0.820948	0.0863901
5	1.19472		0.845352	0.0723044
6	1.20972		0.644902
6	0.981828		0.555604
6	0.808451		0.487121
Part I	CLIP/SNAP Fluorescence intensity ratio
Experiment Day	SNAP-mGluR2/CLIP-mGluR2	SNAP-mGluR2/CLIP-mGluR3	C121A/C121A	C121A/C127A	C121A/C127A-3xTM4
1	0.828531	1.05365	1.75845	0.732342
1	0.588705	0.871613	1.85496	0.875561
1	1.44313	0.986551	1.31458	0.899121
1	0.725936	0.714545	1.08964	1.04739
1	0.797875	0.823555	1.66956	0.849059
2	0.802649	1.74078	0.971322	1.2272	1.41454
2	1.45093	1.42045	0.862389	0.723787	1.41518
2	1.19177	1.51569	1.84755	0.670534	1.70988
2	1.1671	1.93504	1.21914	1.15255	0.653396
2	0.562865	1.3188	1.1941	1.38329	1.25942
3	1.2123	0.930857	0.709129	0.753346	0.971339
3	1.2784	0.640071	0.889001	0.694722	0.548716
3	1.04339	0.592267	0.921248	0.872299	1.23655
3	1.01348	0.825746	0.981897	0.871537	1.31936
3	1.15426	0.636666	0.920107	0.933199	0.804112
4	0.96434		0.662717		1.39915
4	0.913681		0.821611		1.33286
4	1.04447		0.678097		1.02539
4	0.900823		0.93317		0.907831
4	1.10864		0.760598		1.37045
4	1.10563		0.774689		1.33583
Part J	Pulldown (norm.)
Experiment Day	SNAP-mGluR3/CLIP-mGluR3	SNAP-mGluR3/CLIP-mGluR2	C127A/C127A	C127A/C121A	C127A/C121A-3xTM4
1	1.08479	0.915939	0.384468	0.590398
1	0.990381	0.975107	0.469143	0.802552
1	0.924826	0.769054	0.351857	0.637734
1	0.963168	0.781168	0.29504	0.713097
1	1.00664	0.911267	0.428202	0.510854
2	0.912141	0.962928	0.351532	0.829325	0.519747
2	1.04162	1.22591	0.307683	0.913364	0.44045
2	1.13504	0.974161	0.363077	0.784815	0.46598
2	0.987594	1.11707	0.412835	0.848325	0.435378
2	0.923605	1.04276	0.338977	0.612282	0.481055
3	1.02868		0.306922	0.815382	0.674253
3	0.921911		0.339445	0.857134	0.762895
3	1.04941		0.440167	0.848235	0.680352
Part K	CLIP/SNAP Fluorescence intensity ratio
Experiment Day	SNAP-mGluR3/CLIP-mGluR3	SNAP-mGluR3/CLIP-mGluR2	C127A/C127A	C127A/C121A	C127A/C121A-3xTM4
1	0.977622	0.493077		0.935351
1	1.05888	0.959168		1.48816
1	0.907836	0.738464		1.26017
1	0.736369	0.661513		1.0547
1	1.56189	0.575303		0.817191
1	0.970497	0.618931		1.04986
2	0.99534	0.997799	0.913858	1.51943
2	1.23575	0.842818	0.691135	1.84798
2	0.805525	0.631563	0.484982	0.736667
2	1.60561	1.36528	1.103	1.24447
2	0.491171	0.863456	1.2123	1.11781
2	1.4828	1.14541	1.06922	0.910779
3	1.06605		0.852512	0.750358	0.955895
3	1.01869		1.10986	0.915982	0.674466
3	0.787157		1.16681	0.896022	0.838591
3	1.00876		0.927792	0.925408	0.763966
3	0.686771		0.931049	1.13067	0.966142
3	1.0856		0.728279	1.02188	1.36032
3	1.36476		1.30257	1.1706	1.16826
4	0.958197	1.07245	1.07351		1.24919
4	1.00831	1.00238	1.23537		1.3202
4	0.895135	1.06916	1.022		1.3294
4	1.00471	1.01918	1.36714		1.31273
4	1.12192	0.900942	0.887394		1.10504
4	1.00253	1.04498	1.35375		1.1305

## Sheet: Fig 7 Statistics
Figure 7
Part B	p value
t-test (unpaired, two tail)	2.2e-06
Part C
t-test (unpaired, two tail)	0.087
Part E
t-test (unpaired, two tail)	0.0097
Part F
t-test (unpaired, two tail)	0.84
Part H
One-way ANOVA	1.45e-28
Tukey-Kramer
mGluR2/mGluR2 vs. mGluR2/mGluR3	<0.000000000000001
mGluR2/mGluR2 vs. mGluR2-C121A/mGluR2-C121A	0.95
mGluR2/mGluR2 vs. mGluR2-C121A/mGluR3-C127A	<0.000000000000001
mGluR2/mGluR2 vs. mGluR2-C121A/mGluR3-C127A-3xTM4	0.0026
mGluR2/mGluR3 vs. mGluR2-C121A/mGluR2-C121A	<0.000000000000001
mGluR2/mGluR3 vs. mGluR2-C121A/mGluR3-C127A	<0.000000000000001
mGluR2/mGluR3 vs. mGluR2-C121A/mGluR3-C127A-3xTM4	<0.000000000000001
mGluR2-C121A/mGluR2-C121A vs. mGluR2-C121A/mGluR3-C127A	<0.000000000000001
mGluR2-C121A/mGluR2-C121A vs. mGluR2-C121A/mGluR3-C127A-3xTM4	0.026
mGluR2-C121A/mGluR3-C127A vs. mGluR2-C121A/mGluR3-C127A-3xTM4	3.72868e-06
Part I
One-way ANOVA	0.26
Tukey's multiple comparisons test
mGluR2/mGluR2 vs. mGluR2/mGluR3	0.9881
mGluR2/mGluR2 vs. mGluR2-C121A/mGluR2-C121A	0.9504
mGluR2/mGluR2 vs. mGluR2-C121A/mGluR3-C127A	0.8863
mGluR2/mGluR2 vs. mGluR2-C121A/mGluR3-C127A-3xTM4	0.6025
mGluR2/mGluR3 vs. mGluR2-C121A/mGluR2-C121A	0.9998
mGluR2/mGluR3 vs. mGluR2-C121A/mGluR3-C127A	0.6857
mGluR2/mGluR3 vs. mGluR2-C121A/mGluR3-C127A-3xTM4	0.9068
mGluR2-C121A/mGluR2-C121A vs. mGluR2-C121A/mGluR3-C127A	0.5103
mGluR2-C121A/mGluR2-C121A vs. mGluR2-C121A/mGluR3-C127A-3xTM4	0.9388
mGluR2-C121A/mGluR3-C127A vs. mGluR2-C121A/mGluR3-C127A-3xTM4	0.1892
Part J
One-way ANOVA	2.29e-21
Tukey's multiple comparisons test
mGluR3/mGluR3 vs. mGluR3/mGluR2	0.959127
mGluR3/mGluR3 vs. mGluR3-C127A/mGluR3-C127A	<0.000000000000001
mGluR3/mGluR3 vs. mGluR3-C127A/mGluR2-C121A	1.88254e-06
mGluR3/mGluR3 vs. mGluR3-C127A/mGluR2-C121A-3xTM4	6.508e-12
mGluR3/mGluR2 vs. mGluR3-C127A/mGluR3-C127A	<0.000000000000001
mGluR3/mGluR2 vs. mGluR3-C127A/mGluR2-C121A	8.92735e-05
mGluR3/mGluR2 vs. mGluR3-C127A/mGluR2-C121A-3xTM4	5.10909e-10
mGluR3-C127A/mGluR3-C127A vs. mGluR3-C127A/mGluR2-C121A	7.98e-12
mGluR3-C127A/mGluR3-C127A vs. mGluR3-C127A/mGluR2-C121A-3xTM4	0.00172619
mGluR3-C127A/mGluR2-C121A vs. mGluR3-C127A/mGluR2-C121A-3xTM4	0.00128246
Part K
One-way ANOVA	0.11
Tukey's multiple comparisons test
mGluR3/mGluR3 vs. mGluR3/mGluR2	0.3368
mGluR3/mGluR3 vs. mGluR3-C127A/mGluR3-C127A	0.9998
mGluR3/mGluR3 vs. mGluR3-C127A/mGluR2-C121A	0.9328
mGluR3/mGluR3 vs. mGluR3-C127A/mGluR2-C121A-3xTM4	0.966
mGluR3/mGluR2 vs. mGluR3-C127A/mGluR3-C127A	0.4942
mGluR3/mGluR2 vs. mGluR3-C127A/mGluR2-C121A	0.1007
mGluR3/mGluR2 vs. mGluR3-C127A/mGluR2-C121A-3xTM4	0.1868
mGluR3-C127A/mGluR3-C127A vs. mGluR3-C127A/mGluR2-C121A	0.8973
mGluR3-C127A/mGluR3-C127A vs. mGluR3-C127A/mGluR2-C121A-3xTM4	0.9416
mGluR3-C127A/mGluR2-C121A vs. mGluR3-C127A/mGluR2-C121A-3xTM4	>0.9999

## Sheet: Fig 7 - FS 1 Data
Figure 7 - figure supplement 1
Part C
	SNAP-mGluR2-TMD/CLIP-mGluR2-TMD		SNAP-mGluR2-TMD/CLIP-mGluR3-TMD
Experiment Day	# of CLIP spots	# of background spots	# of CLIP spots	# of background spots
1	68	20	41	15
1	82	31	52	20
1	75	22	39	23
1	68	20	54	15
1	60		57	22
1	61		52
2	131	15	68	10
2	152	11	61	11
2	123	13	39	15
2	108	9	66	17
2	121	7	70	6
Part F
	SNAP-mGluR3-TMD/CLIP-mGluR3-TMD		SNAP-mGluR3-TMD/CLIP-mGluR2-TMD
Experiment Day	# of CLIP spots	# of background spots	# of CLIP spots	# of background spots
1	135	10	150	15
1	118	11	160	20
1	127	15	137	23
1	111	17	130	15
1	101	6	106	22
1	130		130
2	89	14	195	17
2	74	10	173	13
2	85	12	217	15
2	88	14	214	14
2	74	12	212	15

## Sheet: Fig 7 - FS 2 Data
Figure 7 - figure supplement 2
Part C	# of CLIP pulldown spots
Experiment Day	SNAP-mGluR2/CLIP-mGluR2	SNAP-mGluR2/CLIP-mGluR3	C121A/C121A	C121A/C127A	C121A/C127A-3xTM4
1	94		79	33	95
1	99		87	35	93
1	91		92	35	76
1	95		98	65	71
1	81		85	66	75
2	137		128	49	66
2	120		114	44	87
2	155		121	44	92
2	106		95	37	85
3	175	232
3	139	215
3	129	213
3	132	201
4	52	134
4	76	105
4	63	123
4	55	111
5	140		135	46
5	107		115	56
5	109		119	48
5	103		125	42
5	114		108	39
6	90		100	35
6	78		81	27
6	71		68	27
	# of CLIP background spots
Experiment Day	SNAP-mGluR2/CLIP-mGluR2	SNAP-mGluR2/CLIP-mGluR3	C121A/C121A	C121A/C127A	C121A/C127A-3xTM4
1	12		14	9	12
1	12		14	14	9
1	10		15	10	12
1	6		20	13	20
1	10		21	14	18
2	9		14	21	8
2	17		12	18	12
2	23		17	25	18
2	10		19	25	16
3	5	32
3	13	35
3	11	31
3	10	32
4	12	10
4	13	9
4	16	13
4	13	9
5	7		16	11
5	18		13	13
5	6		12	15
5	5		10	8
5	14		11	10
6	25		25	8
6	32		27	6
6	24		25	13
Part F	# of CLIP pulldown spots
Experiment Day	SNAP-mGluR3/CLIP-mGluR3	SNAP-mGluR3/CLIP-mGluR2	C127A/C127A	C127A/C121A	C127A/C121A-3xTM4
1	164	151	56	90
1	125	148	65	103
1	122	125	40	79
1	136	138	40	86
1	140	143	45	75
2	179	192	49	94	68
2	184	196	53	98	62
2	196	135	55	115	68
2	209	164	78	97	87
2	221	185	71	96	94
3	237		69	110	82
3	207		75	122	89
3	218		85	111	92
	# of CLIP background spots
Experiment Day	SNAP-mGluR3/CLIP-mGluR3	SNAP-mGluR3/CLIP-mGluR2	C127A/C127A	C127A/C121A	C127A/C121A-3xTM4
1	13	16	14	9
1	9	13	10	8
1	12	12	9	8
1	10	16	7	10
1	14	22	13	6
2	10	10	10	10	6
2	9	8	20	12	11
2	11	9	13	9	13
2	11	7	9	11	11
2	12	10	6	5	18
3	25		29	24	23
3	31		22	29	25
